# Supplementary material for: Perceived Stress and Coping Strategies Among Undergraduate Health Science Students of Jimma University Amid the COVID-19 Outbreak: Online Cross-Sectional Survey
Source: Front Psychol. 2021 Mar 30;12:639955. doi: 10.3389/fpsyg.2021.639955 (PMC8042268; doi:10.3389/fpsyg.2021.639955)
Supplement: Supplementary file 2 [file Data_Sheet_2.xls]

## Sheet: Appendix 2.Dataset
@1.Ageyears	@2.sex	@3.RegionCityofresidency	@4.Residency	@5.MaritalStatus	@6.Doyoulivewithyourparentsorfamilies	@7.Howmuchisyourfamilysize	@8.Estimatedfamilymonthlyincome______ETB	Fieldofstudy	@9.WhichoneisyourfieldofStudy	@10.Studyyear	@1.WhatisyourprimarysourceofCOVID19relatedinformation	@2.WhatisyourjudgmenttowardsaccessedinformationonCOVID1	@3.AreyoustressedbythedailynumberofCOVID19casesdeaths	@4.AreyoustressedbythedailynumberofCOVID19casesdeaths	@5.DoyoutalkonCOVID19relatedupdateswithparentsfriends	@6.Sincetheuniversityhasclosedhowoftendoyoutalkchatw	@7.DoyoueverthinkCOVID19willhavenegativeconsequencesin	@8.DoyouthinkCOVID19changesyourfriendshipbehavior	@9.Doyouthinkyouoryourfamilymembersareatriskofgettin	@10.ifyourresponseisyestotheabovequestionwhyyoucan	@11.Howyouseetherestrictionsi.e.socialdistancingfacema	@12.Areyoufrustratedbyisolationandquarantinemeasurestake	@13.Haveyoueverconfusedbyinconsistentstrategiesdeveloped	@14.Isthereanychangeinfamilybehaviorfollowingoutbreakof	@15.Areyouobservingyourfamilylifestylechangefollowingco	@16.Ifyourresponseisyesfortheabovequestioninwhatway	@17.Ratechangesinhouseholdemploymentorincomefollowingcov	@1.Washyourhandsregularlyusingsoapandwaterforatleast2	@2.Avoidtouchingyoureyesnoseandmouthwithyourhandfing	@3.Coveringmouthandnosewhencoughingorsneezingandwashin	@4.Avoidclosecontactwithanyonewhoissickespeciallythose	@5.Cleananddisinfectfrequentlytouchedobjectsandsurfaces	@6.Stayathomeexcepttogetemergencyneeds	@7.Avoidshakinghandswithothers	@8.Wearingfacemaskwhilegoingoutofhome	@9.Avoidlargegatherings	@1.Inthelastmonthhowoftenhaveyoubeenupsetbecauseofs	@2.Inthelastmonthhowoftenhaveyoufeltthatyouwereunab	@3.Inthelastmonthhowoftenhaveyoufeltnervousandâœstr	@4.Inthelastmonthhowoftenhaveyoufeltconfidentaboutyo	@5.Inthelastmonthhowoftenhaveyoufeltthatthingswereg	@6.Inthelastmonthhowoftenhaveyoufoundthatyoucouldno	@7.Inthelastmonthhowoftenhaveyoubeenabletocontrolir	@8.Inthelastmonthhowoftenhaveyoufeltthatyouwereont	@9.Inthelastmonthhowoftenhaveyoubeenangeredbecauseof	@10.Inthelastmonthhowoftenhaveyoufeltdifficultieswere	TotalPSS	@11.ComparedtobeforetheCOVID19outbreakhowmuchmorehave	@1.Ivebeenturningtoworkorotheractivitiestotakemymind
23	Female	Benishangul Gumuz	Rural	Single	Yes	5	2000	0	Anesthesia	1st year	Social media;Mass media (TV, Radio)	Too much alarming	Yes	Yes	Yes	Every day or almost every day	No	No	No	Less execution of measures	I think the restrictions are too strict	Yes	Yes	No	Yes	Negatively	Decreased	Yes	Yes	Yes	Yes	No	No	Yes	No	Yes	1	2	2	3	2	1	0	1	3	3	18	0	3
30	Male	Oromia	Urban	Married	Yes	3	1500	2	Generic nursing	1st year	Social media and mass media	Too much alarming	Yes	Yes	Yes	Several times a week	No	Yes	Yes	Due to work exposure	I think the restrictions are too strict	Yes	Yes	Yes	Yes	Positively	Decreased	Yes	Yes	Yes	Yes	No	Yes	Yes	Yes	Yes	2	3	0	0	0	4	3	1	2	0	15	2	2
26	Female	Oromia	Urban	Married	Yes	3	9000	5	Neonatal Nursing	1st year	Social media and mass media	Too much alarming	Yes	Yes	Yes	Several times a week	Yes	Yes	Yes	I donâ€™t know	I think the restrictions are too strict	No	No	Yes	Yes	Positively	Not changed	Yes	Yes	Yes	Yes	Yes	Yes	Yes	Yes	Yes	2	2	2	1	3	2	1	1	1	2	17	1	3
30	Male	Oromia	Urban	Married	Yes	4	2000	6	Operational Theatre Nursing	1st year	Social media and mass media	Too much alarming	Yes	Yes	Yes	Several times a week	Yes	Yes	Yes	Due to work exposure	I think the restrictions are not strict enough	Yes	No	Yes	Yes	Positively	Not changed	Yes	Yes	Yes	Yes	Yes	No	Yes	Yes	Yes	3	2	1	3	2	1	3	3	1	3	22	2	4
21	Male	Amhara	Urban	Single	Yes	4	1500	0	Anesthesia	2nd year	Social media	Correct and balanced	Yes	Yes	Yes	Every day or almost every day	Yes	Yes	Yes	Due to work exposure	I think the restrictions are not strict enough	Yes	Yes	Yes	Yes	Positively	Decreased	Yes	Yes	Yes	Yes	No	Yes	Yes	No	Yes	2	3	2	3	2	3	3	2	2	2	24	2	3
21	Male	Oromia	Urban	Single	Yes	8	6000	1	Eniviromental Health	2nd year	Social media and mass media	Correct and balanced	Yes	Yes	Yes	Several times a week	Yes	Yes	Yes	Due to work exposure	I think the restrictions are appropriate	No	No	Yes	No		Decreased	Yes	Yes	Yes	Yes	Yes	Yes	Yes	Yes	Yes	3	4	4	2	4	2	3	3	3	3	31	2	4
22	Male	Sidama	Urban	Single	Yes	6	15000	1	Eniviromental Health	2nd year	Social media and mass media	Correct and balanced	Yes	Yes	Yes	About once a week	Yes	Yes	Yes	Due to work exposure	I think the restrictions are appropriate	No	Yes	Yes	Yes	Positively	Increased	Yes	Yes	Yes	Yes	Yes	Yes	Yes	Yes	Yes	2	2	3	3	2	2	3	2	3	2	24	1	3
20	Female	Oromia	Urban	Single	Yes	5	2000	1	Eniviromental Health	2nd year	Mass media (TV, Radio)	Correct and balanced	Yes	Yes	Yes	Every day or almost every day	Yes	No	Yes	Due to work exposure	I think the restrictions are not strict enough	Yes	No	No	No		Not changed	Yes	Yes	Yes	Yes	Yes	No	Yes	Yes	Yes	1	2	4	3	3	4	1	4	2	3	27	2	4
20	Male	Southern Nation, Nationalities and People Region (SNNPR)	Urban	Single	Yes	6	1000	1	Eniviromental Health	2nd year	Mass media (TV, Radio)	Hide reality not to scare	No	Yes	Yes	Rarely	Yes	No	Yes	Due to work exposure	I think the restrictions are too strict	Yes	Yes	Yes	Yes	Positively	Decreased	Yes	Yes	Yes	Yes	Yes	Yes	Yes	Yes	Yes	0	0	0	4	4	4	1	4	4	4	25	2	1
23	Male	Oromia	Rural	Single	Yes	8	1	1	Eniviromental Health	2nd year	Social media and mass media	Too much alarming	Yes	Yes	Yes	Rarely	Yes	Yes	Yes	Due to work exposure	I think the restrictions are not strict enough	Yes	Yes	Yes	Yes	Negatively	Decreased	No	Yes	Yes	No	No	Yes	Yes	No	No	4	3	2	2	2	3	2	2	2	1	23	2	4
21	Female	Amhara	Urban	Single	Yes	7	10000	1	Eniviromental Health	2nd year	Social media and mass media	Correct and balanced	Yes	No	Yes	Every day or almost every day	Yes	No	No		I think the restrictions are appropriate	Yes	No	Yes	Yes	Positively	Decreased	Yes	Yes	Yes	Yes	Yes	Yes	Yes	Yes	Yes	4	4	4	2	4	3	3	2	4	4	34	2	4
20	Male	Oromia	Urban	Single	Yes	6	15000	1	Eniviromental Health	2nd year	Social media and mass media	Correct and balanced	No	Yes	Yes	Every day or almost every day	Yes	Yes	No	I donâ€™t know	I think the restrictions are not strict enough	Yes	No	No	Yes	Positively	Not changed	Yes	Yes	Yes	Yes	Yes	Yes	Yes	Yes	Yes	2	2	2	3	3	2	2	2	3	3	24	0	3
19	Female	Oromia	Urban	Single	Yes	5	1	2	Generic nursing	2nd year	Social media and mass media	Correct and balanced	Yes	Yes	Yes	Every day or almost every day	Yes	Yes	Yes	Due to existing medical condition	I think the restrictions are appropriate	No	No	Yes	Yes	Negatively	Decreased	Yes	No	Yes	No	No	Yes	Yes	Yes	Yes	2	1	3	1	2	3	3	2	4	3	24	1	1
20	Female	Addis Abeba	Urban	Single	Yes	5	1	2	Generic nursing	2nd year	Social media and mass media	Correct and balanced	No	Yes	Yes	Every day or almost every day	Yes	No	No		I think the restrictions are not strict enough	Yes	No	No	Yes	Positively	Not changed	Yes	Yes	No	Yes	Yes	Yes	Yes	Yes	Yes	4	2	4	4	0	0	3	1	4	2	24	2	2
21	Female	Oromia	Urban	Single	Yes	7	1000	2	Generic nursing	2nd year	Social media and mass media;Community (family, friends...)	Hide reality not to scare	Yes	Yes	Yes	Several times a week	Yes	Yes	Yes	Due to existing medical condition;Due to work exposure;Less execution of measures	I think the restrictions are not strict enough	Yes	Yes	Yes	Yes	Negatively	Decreased	Yes	Yes	Yes	Yes	Yes	No	Yes	Yes	Yes	4	2	3	2	2	1	1	1	3	2	21	1	4
20	Female	Oromia	Urban	Single	Yes	6	17000	2	Generic nursing	2nd year	Social media and mass media	Too much alarming	Yes	Yes	Yes	Several times a week	Yes	Yes	No		I think the restrictions are not strict enough	No	Yes	Yes	Yes	Positively	Decreased	Yes	Yes	Yes	Yes	Yes	Yes	Yes	Yes	Yes	4	2	3	3	2	2	2	1	2	3	24	1	2
19	Female	Oromia	Urban	Single	Yes	6	5000	2	Generic nursing	2nd year	Social media and mass media	Correct and balanced	Yes	Yes	Yes	Every day or almost every day	Yes	No	Yes	Due to work exposure	I think the restrictions are appropriate	Yes	No	No	Yes	Positively	Decreased	Yes	Yes	Yes	Yes	Yes	Yes	Yes	Yes	Yes	2	3	3	1	1	1	2	1	2	1	17	1	1
21	Male	Oromia	Rural	Single	Yes	5	1	2	Generic nursing	2nd year	Social media	Hide reality not to scare	No	No	No	Rarely	Yes	Yes	Yes	Due to existing medical condition;Less execution of measures	I think the restrictions are not strict enough	Yes	Yes	Yes	Yes	Negatively	Decreased	Yes	Yes	Yes	Yes	Yes	No	Yes	No	Yes	0	1	2	3	3	2	2	2	3	1	19	2	4
20	Female	Southern Nation, Nationalities and People Region (SNNPR)	Urban	Single	Yes	8	1	2	Generic nursing	2nd year	Social media and mass media	Correct and balanced	Yes	Yes	Yes	Several times a week	Yes	Yes	No		I think the restrictions are not strict enough	Yes	No	Yes	Yes	Positively	Not changed	Yes	Yes	Yes	Yes	Yes	Yes	Yes	Yes	Yes	2	2	3	1	2	1	4	1	3	4	23	2	4
28	Male	Gambella	Rural	Single	Yes	10	1	2	Generic nursing	2nd year	Social media and mass media	Correct and balanced	Yes	Yes	Yes	Rarely	Yes	Yes	Yes	Due to existing medical condition;Due to work exposure;Less execution of measures	I think the restrictions are appropriate	No	Yes	Yes	Yes	Negatively	Not changed	Yes	Yes	Yes	Yes	Yes	Yes	Yes	Yes	Yes	4	3	2	2	1	2	2	1	4	4	25	1	2
22	Male	Sidama	Urban	Single	Yes	8	12000	2	Generic nursing	2nd year	Social media and mass media	Hide reality not to scare	Yes	Yes	Yes	Rarely	Yes	Yes	No		I think the restrictions are not strict enough	Yes	Yes	Yes	Yes	Positively	Not changed	Yes	Yes	Yes	Yes	Yes	Yes	Yes	Yes	Yes	4	3	4	1	3	4	1	3	4	4	31	2	1
21	Male	Oromia	Urban	Single	Yes	8	2500	2	Generic nursing	2nd year	Social media	Too much alarming	Yes	Yes	Yes	Every day or almost every day	Yes	Yes	Yes	Due to existing medical condition	I think the restrictions are too strict	Yes	Yes	Yes	Yes	Positively	Decreased	Yes	Yes	Yes	Yes	Yes	Yes	Yes	Yes	Yes	1	2	0	0	0	0	3	2	4	1	13	1	2
21	Male	Oromia	Urban	Single	Yes	8	2500	2	Generic nursing	2nd year	Social media	Hide reality not to scare	Yes	Yes	Yes	Every day or almost every day	Yes	Yes	Yes	Due to existing medical condition	I think the restrictions are too strict	Yes	Yes	Yes	Yes	Positively	Decreased	Yes	Yes	Yes	Yes	Yes	Yes	Yes	Yes	Yes	3	4	0	4	2	3	4	4	3	1	28	1	4
21	Female	Oromia	Urban	Single	Yes	5	2555	2	Generic nursing	2nd year	Social media and mass media	Correct and balanced	Yes	Yes	No	Rarely	Yes	Yes	No		I think the restrictions are appropriate	No	No	Yes	Yes	Negatively	Decreased	Yes	Yes	Yes	Yes	Yes	Yes	Yes	Yes	Yes	2	3	3	1	1	3	2	1	3	3	22	2	4
21	Female	Addis Abeba	Urban	Single	Yes	5	8500	2	Generic nursing	2nd year	Social media	Correct and balanced	Yes	Yes	Yes	Several times a week	Yes	I don't know	Yes	Due to work exposure;Less execution of measures;I donâ€™t know	I think the restrictions are appropriate	No	Yes	Yes	Yes	Positively	Decreased	Yes	Yes	Yes	Yes	Yes	Yes	Yes	Yes	Yes	3	4	4	1	0	4	2	0	4	3	25	2	2
21	Female	Addis Abeba	Urban	Single	Yes	5	8500	2	Generic nursing	2nd year	Social media	Correct and balanced	Yes	Yes	Yes	Several times a week	Yes	I don't know	Yes	Due to work exposure;Less execution of measures;I donâ€™t know	I think the restrictions are appropriate	No	Yes	Yes	Yes	Positively	Decreased	Yes	Yes	Yes	Yes	Yes	Yes	Yes	Yes	Yes	3	4	4	1	0	4	2	0	4	3	25	2	2
21	Female	Oromia	Urban	Single	Yes	3	4000	2	Generic nursing	2nd year	Social media;Mass media (TV, Radio);Social media and mass media;Community (family, friends...)	Hide reality not to scare	No	No	Yes	Several times a week	Yes	Yes	No	I donâ€™t know	I think the restrictions are too strict	Yes	Yes	Yes	Yes	Positively	Decreased	Yes	No	Yes	No	Yes	Yes	No	Yes	No	3	2	1	3	2	1	2	2	2	2	20	2	2
21	Female	Southern Nation, Nationalities and People Region (SNNPR)	Urban	Single	Yes	8	1	2	Generic nursing	2nd year	Social media and mass media	Correct and balanced	Yes	Yes	Yes	Several times a week	Yes	No	No		I think the restrictions are too strict	Yes	No	No	No		Not changed	Yes	Yes	Yes	Yes	Yes	Yes	Yes	Yes	Yes	2	1	3	4	3	4	1	2	2	2	24	1	3
20	Female	Oromia	Urban	Single	Yes	5	3000	2	Generic nursing	2nd year	Social media	Too much alarming	Yes	Yes	Yes	Several times a week	Yes	Yes	No	I donâ€™t know	I think the restrictions are appropriate	No	No	Yes	Yes	Positively	Not changed	Yes	Yes	Yes	Yes	Yes	Yes	Yes	Yes	Yes	2	2	2	1	3	3	3	2	2	3	23	2	3
20	Female	Oromia	Urban	Single	Yes	14	1	2	Generic nursing	2nd year	Social media	Correct and balanced	No	Yes	Yes	About once a week	I don't know	No	No	I donâ€™t know	I think the restrictions are not strict enough	Yes	Yes	Yes	Yes	Positively	Increased	Yes	Yes	Yes	Yes	Yes	Yes	Yes	Yes	Yes	2	2	3	3	2	4	3	3	3	3	28	2	3
29	Female	Oromia	Urban	Single	Yes	14	1	2	Generic nursing	2nd year	Social media	Hide reality not to scare	No	Yes	Yes	About once a week	Yes	Yes	No	I donâ€™t know	I think the restrictions are not strict enough	Yes	Yes	Yes	No	Positively	Decreased	Yes	Yes	Yes	Yes	Yes	Yes	Yes	Yes	Yes	2	2	3	3	1	3	1	4	2	2	23	2	4
22	Male	Oromia	Rural	Single	Yes	5	1500	2	Generic nursing	2nd year	Social media and mass media	Correct and balanced	No	No	Yes	Several times a week	Yes	Yes	Yes	Due to work exposure	I think the restrictions are appropriate	No	No	No	Yes		Decreased	Yes	Yes	Yes	Yes	Yes	No	Yes	Yes	Yes	2	3	0	4	2	2	4	2	2	2	23	2	3
20	Female	Oromia	Urban	Single	Yes	6	10000	2	Generic nursing	2nd year	Mass media (TV, Radio)	Too much alarming	Yes	Yes	Yes	Several times a week	Yes	Yes	No		I think the restrictions are not strict enough	Yes	Yes	Yes	Yes	Positively	Decreased	Yes	Yes	Yes	Yes	Yes	Yes	Yes	Yes	Yes	4	3	2	2	3	2	3	2	2	3	26	2	4
20	Female	Oromia	Urban	Single	Yes	6	10000	2	Generic nursing	2nd year	Mass media (TV, Radio)	Too much alarming	Yes	Yes	Yes	Several times a week	Yes	Yes	No		I think the restrictions are not strict enough	Yes	Yes	Yes	Yes	Positively	Decreased	Yes	Yes	Yes	Yes	Yes	Yes	Yes	Yes	Yes	3	3	3	2	3	3	2	2	3	2	26	1	3
21	Male	Southern Nation, Nationalities and People Region (SNNPR)	Urban	Single	Yes	4	8000	2	Generic nursing	2nd year	Social media and mass media	Correct and balanced	Yes	Yes	Yes	Every day or almost every day	Yes	Yes	Yes	Due to work exposure	I think the restrictions are not strict enough	No	No	No	Yes	Positively	Not changed	Yes	Yes	Yes	Yes	Yes	Yes	Yes	Yes	Yes	2	0	3	0	0	2	0	0	1	0	8	1	3
21	Female	Oromia	Urban	Single	Yes	3	1	2	Generic nursing	2nd year	Social media and mass media	Correct and balanced	Yes	Yes	Yes	Several times a week	I don't know	Yes	No	I donâ€™t know	I think the restrictions are not strict enough	No	Yes	Yes	Yes	Negatively	Not changed	Yes	Yes	Yes	Yes	No	Yes	Yes	Yes	No	4	1	3	1	3	0	3	1	0	3	19	0	1
19	Female	Southern Nation, Nationalities and People Region (SNNPR)	Urban	Single	Yes	4	500	2	Generic nursing	2nd year	Mass media (TV, Radio)	Too much alarming	Yes	Yes	Yes	Every day or almost every day	Yes	Yes	Yes	Due to existing medical condition;Less execution of measures	I think the restrictions are not strict enough	Yes	Yes	Yes	Yes		Decreased	Yes	Yes	Yes	Yes	Yes	Yes	Yes	Yes	Yes	4	4	2	2	1	2	2	2	2	2	23	2	2
19	Female	Southern Nation, Nationalities and People Region (SNNPR)	Urban	Single	Yes	4	500	2	Generic nursing	2nd year	Mass media (TV, Radio)	Too much alarming	Yes	Yes	Yes	Every day or almost every day	Yes	Yes	Yes	Due to existing medical condition;Less execution of measures	I think the restrictions are not strict enough	Yes	Yes	Yes	Yes		Decreased	Yes	Yes	Yes	Yes	Yes	Yes	Yes	Yes	Yes	4	4	2	2	1	2	2	2	2	2	23	2	2
20	Female	Oromia	Urban	Single	Yes	12	7000	2	Generic nursing	2nd year	Mass media (TV, Radio)	Too much alarming	No	No	No	Rarely	Yes	Yes	Yes	Due to existing medical condition	I think the restrictions are appropriate	Yes	Yes	No	Yes	Positively	Decreased	No	No	No	Yes	No	Yes	No	No	No	4	4	4	4	4	4	4	4	4	4	40	2	4
22	Female	Oromia	Rural	Married	Yes	5	3000	2	Generic nursing	2nd year	Mass media (TV, Radio)	Correct and balanced	Yes	Yes	No	Several times a week	I don't know	I don't know	No	I donâ€™t know	I think the restrictions are too strict	Yes	No	No	Yes	Positively	Increased	Yes	No	Yes	No	Yes	No	Yes	No	No	4	4	2	2	2	1	1	3	1	4	24	2	4
22	Female	Oromia	Rural	Single	Yes	5	3000	2	Generic nursing	2nd year	Mass media (TV, Radio)	Hide reality not to scare	Yes	Yes	No	Several times a week	No	I don't know	No	I donâ€™t know	I think the restrictions are too strict	Yes	Yes	No	No	Positively	Increased	Yes	Yes	Yes	Yes	No	Yes	Yes	Yes	No	2	2	1	2	4	4	1	0	0	4	20	1	3
21	Male	Oromia	Rural	Single	Yes	10	4000	2	Generic nursing	2nd year	Social media and mass media	Correct and balanced	Yes	Yes	Yes	Several times a week	Yes	Yes	Yes	Due to work exposure	I think the restrictions are appropriate	No	No	Yes	Yes	Negatively	Increased	Yes	Yes	Yes	Yes	No	Yes	Yes	Yes	Yes	2	4	3	2	1	3	4	1	2	2	24	2	4
20	Male	Oromia	Urban	Single	Yes	8	12000	2	Generic nursing	2nd year	Social media and mass media	Correct and balanced	Yes	Yes	Yes	Several times a week	Yes	No	No	Due to work exposure	I think the restrictions are not strict enough	No	Yes	No	No	Positively	Not changed	No	No	No	Yes	No	Yes	No	No	Yes	4	3	4	0	4	0	0	0	4	4	23	2	1
22	Male	Sidama	Urban	Single	Yes	8	11000	2	Generic nursing	2nd year	Social media and mass media	Hide reality not to scare	Yes	Yes	Yes	About once a week	Yes	Yes	Yes		I think the restrictions are not strict enough	Yes	Yes	Yes	Yes	Positively	Decreased	Yes	Yes	Yes	Yes	Yes	Yes	Yes	Yes	Yes	4	4	4	1	2	2	1	1	4	4	27	2	2
20	Female	Oromia	Urban	Single	Yes	4	3000	2	Generic nursing	2nd year	Social media and mass media	Correct and balanced	No	No	Yes	Rarely	Yes	Yes	No		I think the restrictions are appropriate	Yes	No	No	No	Positively	Decreased	Yes	Yes	Yes	Yes	Yes	Yes	Yes	Yes	Yes	0	4	4	0	0	0	4	0	0	0	12	2	4
20	Female	Oromia	Urban	Single	Yes	4	1	2	Generic nursing	2nd year	Social media;Mass media (TV, Radio)	Too much alarming	Yes	Yes	Yes	Every day or almost every day	Yes	No	No	Due to existing medical condition	I think the restrictions are not strict enough	Yes	Yes	Yes	Yes	Positively	Decreased	Yes	Yes	Yes	Yes	Yes	Yes	Yes	Yes	Yes	2	1	2	1	1	0	2	1	1	1	12	1	1
20	Female	Oromia	Urban	Single	Yes	4	5000	2	Generic nursing	2nd year	Social media and mass media	Correct and balanced	Yes	Yes	Yes	Several times a week	Yes	Yes	No		I think the restrictions are too strict	Yes	No	Yes	Yes	Negatively	Not changed	Yes	Yes	Yes	Yes	Yes	Yes	Yes	Yes	Yes	2	2	0	4	2	2	3	3	0	1	19	2	4
21	Female	Oromia	Urban	Single	Yes	5	3000	2	Generic nursing	2nd year	Community (family, friends...)	Correct and balanced	Yes	Yes	Yes	About once a week	I don't know	Yes	No		I think the restrictions are too strict	No	No	Yes	Yes	Positively	Not changed	Yes	No	No	No	Yes	Yes	No	Yes	No	1	1	4	3	2	1	1	2	2	2	19	1	3
21	Female	Oromia	Urban	Single	Yes	5	3000	2	Generic nursing	2nd year	Mass media (TV, Radio)	Too much alarming	Yes	Yes	Yes	Every day or almost every day	No	Yes	No		I think the restrictions are not strict enough	Yes	Yes	Yes	Yes	Positively	Decreased	Yes	No	Yes	No	Yes	Yes	Yes	Yes	Yes	0	3	1	2	0	2	0	0	2	3	13	1	1
22	Male	Oromia	Urban	Single	Yes	13	10000	2	Generic nursing	2nd year	Mass media (TV, Radio)	Too much alarming	Yes	Yes	Yes	Several times a week	Yes	Yes	Yes	Due to existing medical condition;Due to work exposure;Less execution of measures	I think the restrictions are appropriate	No	Yes	Yes	Yes	Negatively	Decreased	No	Yes	Yes	No	Yes	Yes	Yes	Yes	Yes	4	1	3	2	2	2	2	3	4	4	27	2	3
22	Male	Southern Nation, Nationalities and People Region (SNNPR)	Urban	Single	Yes	12	1	3	Generic Midwifey	2nd year	Social media and mass media	Correct and balanced	Yes	Yes	Yes	Rarely	Yes	Yes	Yes	Due to work exposure	I think the restrictions are not strict enough	Yes	Yes	Yes	Yes	Negatively	Decreased	No	Yes	Yes	Yes	No	No	Yes	Yes	No	4	3	2	3	2	2	3	3	2	1	25	1	2
22	Male	Oromia	Rural	Single	Yes	5	3000	3	Generic Midwifey	2nd year	Social media and mass media	Correct and balanced	Yes	Yes	Yes	About once a week	Yes	Yes	Yes	Less execution of measures	I think the restrictions are not strict enough	Yes	Yes	Yes	Yes	Positively	Increased	Yes	Yes	Yes	Yes	Yes	Yes	Yes	Yes	Yes	4	3	3	3	3	3	3	3	3	3	31	1	3
22	Male	Oromia	Rural	Single	Yes	12	4000	3	Generic Midwifey	2nd year	Mass media (TV, Radio)	Too much alarming	Yes	Yes	Yes	About once a week	Yes	Yes	No	I donâ€™t know	I think the restrictions are not strict enough	Yes	Yes	Yes	Yes	Positively	Decreased	Yes	Yes	Yes	Yes	Yes	Yes	Yes	Yes	Yes	3	2	0	1	3	3	4	2	3	1	22	2	3
23	Female	Somalia	Urban	Single	Yes	22	16000	3	Generic Midwifey	2nd year	Community (family, friends...)	Hide reality not to scare	Yes	Yes	Yes	Every day or almost every day	Yes	No	No	Due to existing medical condition;Less execution of measures	I think the restrictions are appropriate	Yes	No	No	No		Not changed	Yes	Yes	Yes	Yes	Yes	Yes	Yes	Yes	Yes	0	2	0	2	1	2	1	2	2	3	15	2	2
20	Male	Addis Abeba	Urban	Single	Yes	5	3000	3	Generic Midwifey	2nd year	Social media and mass media	Correct and balanced	No	No	Yes	Several times a week	I don't know	I don't know	No		I think the restrictions are appropriate	Yes	Yes	Yes	Yes	Positively	Not changed	Yes	No	Yes	Yes	Yes	Yes	Yes	Yes	Yes	2	2	2	1	1	0	1	1	2	1	13	1	3
23	Male	Hareri	Urban	Single	Yes	10	2000	3	Generic Midwifey	2nd year	Social media and mass media	Correct and balanced	Yes	Yes	Yes	Several times a week	Yes	No	Yes	Due to work exposure;Less execution of measures	I think the restrictions are not strict enough	Yes	No	Yes	Yes	Positively	Decreased	Yes	Yes	Yes	Yes	Yes	No	Yes	No	Yes	2	2	2	3	3	1	2	2	2	1	20	2	3
23	Male	Hareri	Urban	Single	Yes	10	2000	3	Generic Midwifey	2nd year	Social media and mass media	Correct and balanced	Yes	Yes	Yes	Several times a week	Yes	No	Yes	Due to work exposure;Less execution of measures	I think the restrictions are not strict enough	Yes	No	Yes	Yes	Positively	Decreased	Yes	Yes	Yes	Yes	Yes	No	Yes	No	Yes	2	2	2	3	3	1	3	2	3	3	24	2	3
21	Female	Addis Abeba	Urban	Single	Yes	6	1000	3	Generic Midwifey	2nd year	Social media	Correct and balanced	Yes	Yes	Yes	Rarely	Yes	No	No		I think the restrictions are not strict enough	No	No	Yes	Yes	Positively	Decreased	Yes	Yes	Yes	Yes	Yes	No	Yes	Yes	Yes	2	3	4	3	4	3	2	3	1	0	25	1	4
20	Female	Addis Abeba	Urban	Single	Yes	6	30000	3	Generic Midwifey	2nd year	Social media	Correct and balanced	No	No	Yes	Several times a week	Yes	I don't know	Yes	Due to work exposure	I think the restrictions are not strict enough	No	No	Yes	Yes	Positively	Decreased	Yes	Yes	Yes	Yes	Yes	Yes	Yes	Yes	Yes	0	2	1	1	0	3	1	0	1	1	10	1	4
20	Female	Sidama	Urban	Single	Yes	3	1	3	Generic Midwifey	2nd year	Social media and mass media;Community (family, friends...)	Too much alarming	No	No	Yes	About once a week	Yes	Yes	Yes	Due to work exposure;Less execution of measures	I think the restrictions are appropriate	No	No	No	Yes	Positively	Increased	Yes	No	Yes	Yes	Yes	Yes	Yes	Yes	Yes	4	3	2	2	0	4	3	0	4	3	25	1	4
19	Female	Oromia	Urban	Single	Yes	7	10000	3	Generic Midwifey	2nd year	Social media and mass media	Correct and balanced	Yes	Yes	Yes	Several times a week	Yes	Yes	No		I think the restrictions are too strict	No	No	No	No		Decreased	Yes	Yes	Yes	Yes	Yes	Yes	Yes	Yes	Yes	0	0	0	0	0	0	0	0	0	0	0	1	1
22	Male	Oromia	Rural	Single	Yes	12	4000	3	Generic Midwifey	2nd year	Mass media (TV, Radio)	Too much alarming	Yes	Yes	Yes	About once a week	Yes	Yes	No	I donâ€™t know	I think the restrictions are not strict enough	Yes	No	Yes	Yes	Positively	Decreased	Yes	Yes	Yes	Yes	Yes	Yes	Yes	Yes	Yes	2	4	1	2	0	1	2	2	2	1	17	1	1
20	Female	Addis Abeba	Urban	Single	Yes	6	10000	3	Generic Midwifey	2nd year	Social media and mass media	Correct and balanced	Yes	Yes	Yes	About once a week	Yes	Yes	No		I think the restrictions are appropriate	No	No	Yes	Yes	Positively	Decreased	Yes	Yes	Yes	Yes	Yes	Yes	Yes	Yes	Yes	2	2	2	3	2	1	3	2	2	2	21	1	3
21	Female	Oromia	Rural	Single	Yes	5	3000	3	Generic Midwifey	2nd year	Social media	Correct and balanced	Yes	Yes	Yes	Several times a week	Yes	Yes	Yes	I donâ€™t know	I think the restrictions are too strict	Yes	Yes	Yes	Yes	Positively	Not changed	Yes	Yes	Yes	Yes	Yes	Yes	Yes	Yes	Yes	1	1	2	0	3	3	4	4	2	3	23	1	2
20	Female	Sidama	Urban	Single	Yes	9	6000	3	Generic Midwifey	2nd year	Social media	Too much alarming	Yes	Yes	Yes	Every day or almost every day	I don't know	I don't know	No		I think the restrictions are too strict	Yes	Yes	Yes	No		Decreased	Yes	Yes	Yes	Yes	Yes	Yes	Yes	Yes	Yes	1	1	2	3	0	3	2	1	4	2	19	1	3
20	Male	Sidama	Urban	Single	Yes	6	5000	3	Generic Midwifey	2nd year	Social media and mass media	Correct and balanced	No	Yes	Yes	Several times a week	Yes	Yes	Yes	Due to work exposure	I think the restrictions are not strict enough	No	No	Yes	No		Decreased	Yes	Yes	Yes	Yes	Yes	Yes	Yes	Yes	Yes	3	0	1	3	3	0	2	0	4	2	18	1	3
21	Female	Addis Abeba	Urban	Single	Yes	7	1	3	Generic Midwifey	2nd year	Social media	Correct and balanced	No	Yes	Yes	About once a week	Yes	No	Yes	Due to work exposure	I think the restrictions are not strict enough	Yes	Yes	No	Yes	Positively	Not changed	Yes	Yes	Yes	Yes	Yes	Yes	Yes	Yes	Yes	3	2	2	3	4	2	2	3	2	2	25	0	3
21	Female	Amhara	Rural	Single	Yes	1	4000	3	Generic Midwifey	2nd year	Community (family, friends...)	Correct and balanced	Yes	Yes	Yes	Several times a week	Yes	No	No		I think the restrictions are appropriate	No	No	No	No		Decreased	Yes	Yes	Yes	Yes	Yes	Yes	Yes	Yes	Yes	2	4	3	3	3	3	3	3	2	3	29	2	3
21	Female	Amhara	Rural	Single	Yes	1	3000	3	Generic Midwifey	2nd year	Community (family, friends...)	Correct and balanced	Yes	Yes	Yes	Rarely	Yes	No	No		I think the restrictions are appropriate	Yes	Yes	No	No		Decreased	No	Yes	Yes	Yes	Yes	Yes	Yes	Yes	Yes	3	3	3	3	3	3	3	3	3	3	30	2	3
20	Female	Oromia	Urban	Single	Yes	10	50000	3	Generic Midwifey	2nd year	Social media	Too much alarming	Yes	Yes	Yes	Several times a week	Yes	Yes	No		I think the restrictions are not strict enough	No	Yes	Yes	Yes	Positively	Not changed	Yes	Yes	Yes	Yes	Yes	Yes	Yes	Yes	Yes	4	4	2	4	2	3	4	4	4	4	35	2	3
23	Female	Oromia	Urban	Single	Yes	4	1	3	Generic Midwifey	2nd year	Social media and mass media	Correct and balanced	Yes	Yes	Yes	Several times a week	I don't know	I don't know	No	I donâ€™t know	I think the restrictions are too strict	No	Yes	Yes	Yes	Negatively	Increased	Yes	Yes	Yes	Yes	Yes	Yes	Yes	Yes	Yes	1	2	1	3	3	4	3	1	2	2	22	2	3
30	Male	Oromia	Urban	Married	Yes	5	4000	3	Generic Midwifey	2nd year	Mass media (TV, Radio)	Too much alarming	Yes	Yes	Yes	Rarely	Yes	No	Yes	Due to work exposure	I think the restrictions are not strict enough	No	Yes	Yes	Yes	Negatively	Decreased	Yes	Yes	Yes	Yes	Yes	Yes	Yes	Yes	Yes	3	3	4	2	2	2	3	3	2	3	27	1	3
21	Male	Oromia	Rural	Single	Yes	6	7000	3	Generic Midwifey	2nd year	Social media and mass media	Correct and balanced	No	No	Yes	About once a week	Yes	Yes	Yes	Due to work exposure	I think the restrictions are appropriate	Yes	No	No	No		Not changed	Yes	Yes	Yes	Yes	Yes	Yes	Yes	Yes	Yes	0	0	1	3	3	1	2	3	2	3	18	2	3
21	Male	Oromia	Rural	Single	Yes	6	7000	3	Generic Midwifey	2nd year	Social media and mass media	Correct and balanced	No	No	Yes	About once a week	Yes	Yes	Yes	Due to work exposure	I think the restrictions are appropriate	Yes	No	No	No		Not changed	Yes	Yes	Yes	Yes	Yes	Yes	Yes	Yes	Yes	0	0	1	3	3	1	2	3	2	3	18	2	3
21	Female	Oromia	Urban	Single	Yes	4	#NULL!	3	Generic Midwifey	2nd year	Social media and mass media	Correct and balanced	Yes	Yes	Yes	Several times a week	Yes	I don't know	Yes	Due to work exposure	I think the restrictions are not strict enough	Yes	Yes	No	Yes	Positively	Decreased	Yes	Yes	Yes	Yes	Yes	Yes	Yes	Yes	Yes	2	0	1	3	1	1	3	2	2	1	16	0	1
21	Female	Oromia	Urban	Single	Yes	6	5000	3	Generic Midwifey	2nd year	Social media	Correct and balanced	Yes	Yes	Yes	Every day or almost every day	Yes	Yes	Yes	Due to existing medical condition;Due to work exposure;Less execution of measures	I think the restrictions are not strict enough	No	Yes	Yes	Yes	Positively	Not changed	Yes	Yes	Yes	Yes	Yes	Yes	Yes	Yes	Yes	0	0	3	0	4	0	1	1	4	3	16	2	3
20	Female	Addis Abeba	Urban	Single	Yes	7	3000	4	Medical labratory	2nd year	Mass media (TV, Radio)	Hide reality not to scare	Yes	Yes	No	Rarely	Yes	No	No		I think the restrictions are not strict enough	No	No	No	Yes	Positively	Decreased	No	Yes	No	Yes	Yes	Yes	Yes	Yes	Yes	3	3	4	3	2	3	3	3	3	2	29	1	4
20	Male	Oromia	Urban	Single	Yes	8	1	4	Medical labratory	2nd year	Social media;Community (family, friends...)	Hide reality not to scare	Yes	Yes	No	Several times a week	I don't know	I don't know	Yes	I donâ€™t know	I think the restrictions are too strict	No	No	Yes	Yes	Negatively	Increased	Yes	Yes	Yes	No	No	No	No	Yes	Yes	0	2	1	1	0	1	0	3	1	0	9	2	2
22	Female	Oromia	Urban	Single	Yes	10	3250	4	Medical labratory	2nd year	Social media	Hide reality not to scare	Yes	Yes	Yes	Several times a week	I don't know	No	No	I donâ€™t know	I think the restrictions are not strict enough	Yes	Yes	Yes	Yes	Positively	Not changed	Yes	Yes	Yes	Yes	Yes	Yes	Yes	Yes	Yes	2	0	2	4	0	1	1	0	3	2	15	0	2
22	Male	Oromia	Urban	Single	Yes	4	2000	4	Medical labratory	2nd year	Social media	Hide reality not to scare	Yes	Yes	Yes	About once a week	Yes	Yes	No	Less execution of measures	I think the restrictions are appropriate	Yes	Yes	Yes	Yes	Positively	Increased	Yes	Yes	Yes	Yes	Yes	Yes	Yes	Yes	Yes	0	0	0	0	0	0	0	0	0	0	0	2	3
27	Female	Oromia	Urban	Divorced	Yes	6	5000	5	Neonatal Nursing	2nd year	Social media and mass media	Too much alarming	Yes	Yes	Yes	Several times a week	Yes	Yes	Yes	Due to work exposure	I think the restrictions are not strict enough	No	Yes	Yes	Yes	Positively	Not changed	Yes	Yes	No	Yes	Yes	Yes	Yes	Yes	Yes	0	4	2	4	2	2	2	0	4	0	20	2	1
31	Male	Oromia	Rural	Married	Yes	6	4000	5	Neonatal Nursing	2nd year	Mass media (TV, Radio)	Correct and balanced	Yes	Yes	No	Rarely	I don't know	Yes	Yes	Less execution of measures	I think the restrictions are too strict	Yes	Yes	Yes	Yes	Positively	Decreased	Yes	Yes	Yes	Yes	Yes	Yes	Yes	Yes	Yes	3	3	2	3	3	3	3	3	4	3	30	1	3
29	Male	Oromia	Urban	Single	No	2	1500	5	Neonatal Nursing	2nd year	Social media and mass media	Correct and balanced	Yes	Yes	Yes	Every day or almost every day	Yes	Yes	No		I think the restrictions are not strict enough	Yes	No	Yes	Yes	Negatively	Increased	Yes	Yes	Yes	Yes	Yes	Yes	Yes	Yes	Yes	2	3	1	4	2	2	3	2	2	3	24	2	3
29	Male	Oromia	Urban	Single	Yes	4	1500	5	Neonatal Nursing	2nd year	Social media and mass media	Too much alarming	Yes	Yes	Yes	Every day or almost every day	Yes	Yes	Yes	Due to work exposure	I think the restrictions are not strict enough	Yes	No	Yes	Yes	Positively	Decreased	Yes	Yes	Yes	Yes	Yes	Yes	Yes	Yes	Yes	2	1	2	2	3	3	4	3	1	2	23	1	3
28	Male	Oromia	Urban	Single	No	8	2000	5	Neonatal Nursing	2nd year	Social media and mass media	Correct and balanced	Yes	No	Yes	About once a week	Yes	Yes	Yes	Due to existing medical condition	I think the restrictions are too strict	Yes	Yes	Yes	Yes	Positively	Decreased	Yes	Yes	Yes	Yes	Yes	No	Yes	Yes	Yes	4	2	2	3	3	3	3	2	1	2	25	1	4
30	Male	Oromia	Urban	Married	Yes	4	300	5	Neonatal Nursing	2nd year	Mass media (TV, Radio)	Too much alarming	Yes	Yes	No	Several times a week	Yes	Yes	Yes	Due to work exposure	I think the restrictions are too strict	No	No	No	Yes	Positively	Decreased	Yes	Yes	Yes	Yes	Yes	No	Yes	Yes	Yes	3	0	3	0	0	0	4	3	4	0	17	2	4
25	Female	Oromia	Urban	Married	Yes	3	4637	5	Neonatal Nursing	2nd year	Mass media (TV, Radio)	Hide reality not to scare	Yes	Yes	Yes	About once a week	Yes	No	No		I think the restrictions are not strict enough	No	Yes	No	No		Decreased	Yes	Yes	Yes	Yes	Yes	Yes	Yes	Yes	Yes	0	0	2	3	1	0	3	1	2	3	15	1	3
30	Male	Oromia	Urban	Married	Yes	4	3000	5	Neonatal Nursing	2nd year	Social media and mass media	Too much alarming	Yes	Yes	Yes	Several times a week	Yes	Yes	Yes	Due to work exposure	I think the restrictions are too strict	No	No	Yes	Yes	Negatively	Decreased	Yes	Yes	Yes	Yes	Yes	No	Yes	Yes	Yes	2	1	1	4	4	1	3	2	4	1	23	2	4
30	Male	Oromia	Urban	Married	Yes	4	3000	5	Neonatal Nursing	2nd year	Social media and mass media	Too much alarming	Yes	Yes	Yes	Several times a week	Yes	Yes	Yes	Due to work exposure	I think the restrictions are too strict	No	No	Yes	Yes	Negatively	Decreased	Yes	Yes	Yes	Yes	Yes	No	Yes	Yes	Yes	2	1	1	4	4	1	3	2	4	1	23	2	4
30	Male	Oromia	Urban	Married	Yes	4	3000	5	Neonatal Nursing	2nd year	Social media and mass media	Too much alarming	Yes	Yes	Yes	Several times a week	Yes	Yes	Yes	Due to work exposure	I think the restrictions are too strict	No	No	Yes	Yes	Negatively	Decreased	Yes	Yes	Yes	Yes	Yes	No	Yes	Yes	Yes	2	1	1	4	4	1	3	2	4	1	23	2	4
25	Female	Oromia	Urban	Single	No	2	3000	5	Neonatal Nursing	2nd year	Social media and mass media	Too much alarming	Yes	Yes	Yes	Every day or almost every day	Yes	Yes	Yes	Due to work exposure	I think the restrictions are not strict enough	No	Yes	Yes	Yes	Positively	Not changed	Yes	Yes	Yes	Yes	Yes	Yes	Yes	Yes	Yes	0	2	1	1	0	1	0	0	0	0	5	0	2
30	Female	Oromia	Urban	Married	Yes	3	8000	5	Neonatal Nursing	2nd year	Social media and mass media	Too much alarming	Yes	Yes	Yes	Every day or almost every day	Yes	Yes	No		I think the restrictions are not strict enough	No	No	Yes	Yes	Negatively	Decreased	Yes	Yes	Yes	Yes	Yes	Yes	Yes	Yes	Yes	3	4	4	3	4	3	4	4	4	3	36	2	4
28	Female	Oromia	Urban	Married	Yes	2	5000	5	Neonatal Nursing	2nd year	Social media and mass media	Hide reality not to scare	Yes	Yes	Yes	About once a week	Yes	I don't know	Yes	Due to work exposure	I think the restrictions are not strict enough	Yes	Yes	Yes	No		Increased	Yes	Yes	Yes	Yes	Yes	Yes	Yes	Yes	Yes	2	3	4	2	3	2	4	4	3	3	30	2	3
30	Female	Oromia	Urban	Married	Yes	3	8000	5	Neonatal Nursing	2nd year	Social media and mass media	Too much alarming	Yes	Yes	Yes	Every day or almost every day	Yes	Yes	No		I think the restrictions are not strict enough	No	No	Yes	Yes	Negatively	Decreased	Yes	Yes	Yes	Yes	Yes	Yes	Yes	Yes	Yes	4	4	3	4	3	4	4	4	3	4	37	2	4
30	Female	Oromia	Urban	Married	Yes	3	8000	5	Neonatal Nursing	2nd year	Social media and mass media	Too much alarming	Yes	Yes	Yes	Every day or almost every day	Yes	Yes	No		I think the restrictions are not strict enough	No	No	Yes	Yes	Negatively	Decreased	Yes	Yes	Yes	Yes	Yes	Yes	Yes	Yes	Yes	4	4	3	4	4	3	4	4	4	4	38	2	1
25	Female	Oromia	Urban	Married	Yes	4	3000	5	Neonatal Nursing	2nd year	Social media;Mass media (TV, Radio);Social media and mass media;Community (family, friends...)	Too much alarming	Yes	Yes	Yes	Every day or almost every day	I don't know	Yes	No	I donâ€™t know	I think the restrictions are not strict enough	Yes	Yes	Yes	Yes	Positively	Decreased	Yes	Yes	Yes	Yes	Yes	No	Yes	Yes	Yes	4	4	4	0	4	2	2	2	4	4	30	2	4
30	Female	Oromia	Urban	Married	Yes	5	7000	5	Neonatal Nursing	2nd year	Social media and mass media	Too much alarming	Yes	Yes	Yes	About once a week	Yes	Yes	No		I think the restrictions are not strict enough	No	No	Yes	Yes	Negatively	Decreased	Yes	No	Yes	Yes	Yes	Yes	Yes	Yes	Yes	3	3	4	2	2	1	1	2	3	3	24	2	3
20	Female	Oromia	Urban	Single	Yes	14	1	5	Neonatal Nursing	2nd year	Social media	Hide reality not to scare	Yes	Yes	Yes	About once a week	Yes	No	No	I donâ€™t know	I think the restrictions are too strict	Yes	Yes	Yes	Yes	Positively	Decreased	Yes	Yes	Yes	Yes	Yes	Yes	Yes	Yes	Yes	2	2	3	3	3	4	4	2	2	3	28	2	3
20	Female	Oromia	Urban	Single	Yes	14	1	5	Neonatal Nursing	2nd year	Social media	Hide reality not to scare	Yes	Yes	Yes	About once a week	Yes	Yes	No	Less execution of measures	I think the restrictions are too strict	Yes	Yes	Yes	Yes	Positively	Decreased	Yes	Yes	Yes	Yes	Yes	Yes	Yes	Yes	Yes	2	2	3	3	4	4	3	2	2	3	28	2	3
20	Female	Oromia	Urban	Single	Yes	14	1	5	Neonatal Nursing	2nd year	Social media	Hide reality not to scare	Yes	Yes	Yes	About once a week	Yes	Yes	Yes	Less execution of measures	I think the restrictions are too strict	Yes	Yes	Yes	Yes	Positively	Decreased	Yes	Yes	Yes	Yes	Yes	Yes	Yes	Yes	Yes	2	2	3	3	4	3	4	2	2	2	27	2	3
20	Female	Oromia	Urban	Single	Yes	14	1	5	Neonatal Nursing	2nd year	Social media	Hide reality not to scare	Yes	Yes	Yes	About once a week	Yes	No	Yes	I donâ€™t know	I think the restrictions are not strict enough	Yes	Yes	Yes	Yes	Positively	Decreased	Yes	Yes	Yes	Yes	Yes	Yes	Yes	Yes	Yes	3	3	3	2	3	3	3	4	1	3	28	2	4
22	Male	Sidama	Rural	Single	Yes	8	200	5	Neonatal Nursing	2nd year	Social media	Correct and balanced	No	No	Yes	Every day or almost every day	Yes	Yes	No	I donâ€™t know	I think the restrictions are appropriate	No	No	Yes	Yes	Positively	Increased	Yes	Yes	Yes	Yes	Yes	Yes	Yes	Yes	Yes	0	2	2	4	3	3	4	3	0	0	21	0	4
22	Male	Oromia	Rural	Single	Yes	8	200	5	Neonatal Nursing	2nd year	Social media	Correct and balanced	No	Yes	Yes	Every day or almost every day	Yes	Yes	No	I donâ€™t know	I think the restrictions are appropriate	Yes	Yes	Yes	Yes	Positively	Decreased	Yes	Yes	Yes	Yes	Yes	Yes	Yes	Yes	Yes	1	2	2	1	3	2	3	3	3	1	21	1	3
22	Male	Oromia	Rural	Single	Yes	8	2000	5	Neonatal Nursing	2nd year	Social media	Correct and balanced	No	No	Yes	Every day or almost every day	Yes	Yes	Yes	Due to existing medical condition	I think the restrictions are not strict enough	Yes	Yes	Yes	Yes	Positively	Increased	Yes	Yes	Yes	Yes	Yes	Yes	Yes	Yes	Yes	0	4	3	3	1	2	3	3	4	4	27	1	4
22	Male	Oromia	Rural	Single	Yes	8	2000	5	Neonatal Nursing	2nd year	Social media	Too much alarming	Yes	Yes	Yes	Every day or almost every day	Yes	Yes	Yes	Due to existing medical condition	I think the restrictions are not strict enough	Yes	Yes	Yes	Yes	Positively	Increased	Yes	Yes	Yes	Yes	Yes	Yes	Yes	Yes	Yes	0	1	3	3	3	1	4	4	4	1	24	1	2
22	Male	Oromia	Rural	Single	Yes	8	2000	5	Neonatal Nursing	2nd year	Social media	Too much alarming	Yes	Yes	Yes	Every day or almost every day	Yes	Yes	Yes	Due to existing medical condition	I think the restrictions are not strict enough	Yes	Yes	Yes	Yes	Positively	Increased	Yes	Yes	Yes	Yes	Yes	Yes	Yes	Yes	Yes	0	1	3	3	3	1	4	4	4	1	24	1	2
22	Male	Oromia	Rural	Single	Yes	8	2000	5	Neonatal Nursing	2nd year	Social media	Too much alarming	Yes	Yes	Yes	Every day or almost every day	Yes	Yes	Yes	Due to existing medical condition	I think the restrictions are not strict enough	Yes	Yes	Yes	Yes	Positively	Increased	Yes	Yes	Yes	Yes	Yes	Yes	Yes	Yes	Yes	0	1	3	3	3	1	4	4	4	1	24	1	2
22	Male	Oromia	Rural	Single	Yes	8	2000	5	Neonatal Nursing	2nd year	Social media	Correct and balanced	Yes	Yes	Yes	Every day or almost every day	Yes	Yes	Yes	Due to existing medical condition	I think the restrictions are not strict enough	Yes	Yes	Yes	Yes	Positively	Increased	Yes	Yes	Yes	Yes	Yes	Yes	Yes	Yes	Yes	0	1	2	2	3	3	3	4	4	3	25	1	1
22	Male	Oromia	Rural	Single	Yes	8	2000	5	Neonatal Nursing	2nd year	Social media	Correct and balanced	Yes	Yes	Yes	Every day or almost every day	Yes	Yes	Yes	Due to existing medical condition	I think the restrictions are not strict enough	Yes	Yes	Yes	Yes	Positively	Increased	Yes	Yes	Yes	Yes	Yes	Yes	Yes	Yes	Yes	0	1	2	2	3	3	3	4	4	3	25	1	1
22	Male	Oromia	Rural	Single	Yes	8	2000	5	Neonatal Nursing	2nd year	Social media	Correct and balanced	Yes	Yes	Yes	Every day or almost every day	Yes	Yes	Yes	Due to existing medical condition	I think the restrictions are not strict enough	Yes	Yes	Yes	Yes	Positively	Decreased	Yes	Yes	Yes	Yes	Yes	Yes	Yes	Yes	Yes	1	1	1	2	4	4	3	3	4	1	24	1	2
22	Male	Oromia	Rural	Single	Yes	8	2000	5	Neonatal Nursing	2nd year	Social media	Correct and balanced	Yes	Yes	Yes	Every day or almost every day	Yes	Yes	Yes	Due to existing medical condition	I think the restrictions are not strict enough	Yes	Yes	Yes	Yes	Positively	Decreased	Yes	Yes	Yes	Yes	Yes	Yes	Yes	Yes	Yes	1	1	1	2	4	4	3	3	4	1	24	1	2
22	Male	Oromia	Rural	Single	Yes	8	2000	5	Neonatal Nursing	2nd year	Social media	Correct and balanced	Yes	Yes	Yes	Every day or almost every day	Yes	Yes	Yes	Due to existing medical condition	I think the restrictions are not strict enough	Yes	Yes	Yes	Yes	Positively	Decreased	Yes	Yes	Yes	Yes	Yes	Yes	Yes	Yes	Yes	1	1	1	2	4	4	3	3	4	1	24	1	2
22	Male	Oromia	Rural	Single	Yes	8	2000	5	Neonatal Nursing	2nd year	Social media	Correct and balanced	Yes	Yes	Yes	Every day or almost every day	Yes	Yes	Yes	Due to existing medical condition	I think the restrictions are not strict enough	Yes	Yes	Yes	Yes	Positively	Decreased	Yes	Yes	Yes	Yes	Yes	Yes	Yes	Yes	Yes	1	2	3	2	2	1	2	1	3	3	20	1	2
22	Male	Oromia	Rural	Single	Yes	8	2000	5	Neonatal Nursing	2nd year	Social media	Correct and balanced	Yes	Yes	Yes	Every day or almost every day	Yes	Yes	Yes	Due to existing medical condition	I think the restrictions are not strict enough	Yes	Yes	Yes	Yes	Positively	Decreased	Yes	Yes	Yes	Yes	Yes	Yes	Yes	Yes	Yes	1	2	3	3	2	4	2	4	3	3	27	2	3
22	Male	Oromia	Rural	Single	Yes	8	2000	5	Neonatal Nursing	2nd year	Social media	Correct and balanced	Yes	Yes	Yes	Every day or almost every day	Yes	Yes	Yes	Due to existing medical condition	I think the restrictions are not strict enough	Yes	Yes	Yes	Yes	Positively	Decreased	Yes	Yes	Yes	Yes	Yes	Yes	Yes	Yes	Yes	1	2	3	3	2	4	2	4	3	3	27	2	3
22	Male	Oromia	Rural	Single	Yes	8	2000	5	Neonatal Nursing	2nd year	Social media	Correct and balanced	Yes	Yes	Yes	Every day or almost every day	Yes	Yes	Yes	Due to existing medical condition	I think the restrictions are not strict enough	Yes	Yes	Yes	Yes	Positively	Decreased	Yes	Yes	Yes	Yes	Yes	Yes	Yes	Yes	Yes	1	2	3	3	2	4	2	4	3	3	27	2	3
22	Male	Oromia	Rural	Single	Yes	8	2000	5	Neonatal Nursing	2nd year	Social media	Correct and balanced	Yes	Yes	Yes	Every day or almost every day	Yes	Yes	Yes	Due to existing medical condition	I think the restrictions are not strict enough	Yes	Yes	Yes	Yes	Positively	Decreased	Yes	Yes	Yes	Yes	Yes	Yes	Yes	Yes	Yes	1	2	3	3	2	4	2	4	3	3	27	2	3
22	Male	Oromia	Rural	Single	Yes	8	2000	5	Neonatal Nursing	2nd year	Social media	Correct and balanced	Yes	Yes	Yes	Every day or almost every day	Yes	Yes	Yes	Due to existing medical condition	I think the restrictions are not strict enough	Yes	Yes	Yes	Yes	Positively	Decreased	Yes	Yes	Yes	Yes	Yes	Yes	Yes	Yes	Yes	1	2	3	3	2	4	2	4	3	3	27	2	3
22	Male	Oromia	Rural	Single	Yes	8	2000	5	Neonatal Nursing	2nd year	Social media	Correct and balanced	Yes	Yes	Yes	Every day or almost every day	Yes	Yes	Yes	Due to existing medical condition	I think the restrictions are not strict enough	Yes	Yes	Yes	Yes	Positively	Decreased	Yes	Yes	Yes	Yes	Yes	Yes	Yes	Yes	Yes	1	2	3	3	2	4	2	4	3	3	27	2	3
22	Male	Oromia	Rural	Single	Yes	8	2000	5	Neonatal Nursing	2nd year	Social media	Correct and balanced	Yes	Yes	Yes	Every day or almost every day	Yes	Yes	Yes	Due to existing medical condition	I think the restrictions are not strict enough	Yes	Yes	Yes	Yes	Positively	Decreased	Yes	Yes	Yes	Yes	Yes	Yes	Yes	Yes	Yes	1	2	3	3	2	4	2	4	3	3	27	2	3
22	Male	Oromia	Rural	Single	Yes	8	2000	5	Neonatal Nursing	2nd year	Social media	Correct and balanced	Yes	Yes	Yes	Every day or almost every day	Yes	Yes	Yes	Due to existing medical condition	I think the restrictions are not strict enough	Yes	Yes	Yes	Yes	Positively	Decreased	Yes	Yes	Yes	Yes	Yes	Yes	Yes	Yes	Yes	1	2	3	3	2	4	2	4	3	3	27	2	3
22	Male	Oromia	Rural	Single	Yes	8	2000	5	Neonatal Nursing	2nd year	Social media	Correct and balanced	Yes	Yes	Yes	Every day or almost every day	Yes	Yes	Yes	Due to existing medical condition	I think the restrictions are not strict enough	Yes	Yes	Yes	Yes	Positively	Decreased	Yes	Yes	Yes	Yes	Yes	Yes	Yes	Yes	Yes	1	2	3	3	2	4	2	4	3	3	27	2	3
22	Male	Oromia	Rural	Single	Yes	8	2000	5	Neonatal Nursing	2nd year	Social media	Correct and balanced	Yes	Yes	Yes	Every day or almost every day	Yes	Yes	Yes	Due to existing medical condition	I think the restrictions are not strict enough	Yes	Yes	Yes	Yes	Positively	Decreased	Yes	Yes	Yes	Yes	Yes	Yes	Yes	Yes	Yes	0	2	2	3	2	1	2	3	4	3	22	2	3
22	Male	Oromia	Rural	Single	Yes	8	2000	5	Neonatal Nursing	2nd year	Social media	Correct and balanced	Yes	Yes	Yes	Every day or almost every day	Yes	Yes	Yes	Due to existing medical condition	I think the restrictions are not strict enough	Yes	Yes	Yes	Yes	Positively	Decreased	Yes	Yes	Yes	Yes	Yes	Yes	Yes	Yes	Yes	0	2	2	3	2	1	2	3	4	3	22	2	3
22	Male	Oromia	Rural	Single	Yes	8	2000	5	Neonatal Nursing	2nd year	Social media	Correct and balanced	Yes	Yes	Yes	Every day or almost every day	Yes	Yes	Yes	Due to existing medical condition	I think the restrictions are not strict enough	Yes	Yes	Yes	Yes	Positively	Decreased	Yes	Yes	Yes	Yes	Yes	Yes	Yes	Yes	Yes	0	2	2	3	2	1	2	3	4	3	22	2	3
22	Male	Oromia	Rural	Single	Yes	8	2000	5	Neonatal Nursing	2nd year	Social media	Correct and balanced	Yes	Yes	Yes	Every day or almost every day	Yes	Yes	Yes	Due to existing medical condition	I think the restrictions are not strict enough	Yes	Yes	Yes	Yes	Positively	Decreased	Yes	Yes	Yes	Yes	Yes	Yes	Yes	Yes	Yes	0	2	2	3	2	1	2	3	4	3	22	2	3
22	Male	Oromia	Rural	Single	Yes	8	2000	5	Neonatal Nursing	2nd year	Social media	Correct and balanced	Yes	Yes	Yes	Every day or almost every day	Yes	Yes	Yes	Due to existing medical condition	I think the restrictions are not strict enough	Yes	Yes	Yes	Yes	Positively	Decreased	Yes	Yes	Yes	Yes	Yes	Yes	Yes	Yes	Yes	0	2	2	3	2	1	2	3	4	3	22	2	3
22	Male	Oromia	Rural	Single	Yes	8	2000	5	Neonatal Nursing	2nd year	Social media	Correct and balanced	Yes	Yes	Yes	Every day or almost every day	Yes	Yes	Yes	Due to existing medical condition	I think the restrictions are not strict enough	Yes	Yes	Yes	Yes	Positively	Decreased	Yes	Yes	Yes	Yes	Yes	Yes	Yes	Yes	Yes	0	2	2	3	2	1	2	3	4	3	22	2	3
22	Male	Oromia	Rural	Single	Yes	8	2000	5	Neonatal Nursing	2nd year	Social media	Correct and balanced	Yes	Yes	Yes	Every day or almost every day	Yes	Yes	Yes	Due to existing medical condition	I think the restrictions are not strict enough	Yes	Yes	Yes	Yes	Positively	Decreased	Yes	Yes	Yes	Yes	Yes	Yes	Yes	Yes	Yes	2	3	3	3	2	2	3	2	2	2	24	2	4
22	Male	Oromia	Rural	Single	Yes	8	2000	5	Neonatal Nursing	2nd year	Social media	Correct and balanced	Yes	Yes	Yes	Every day or almost every day	Yes	Yes	Yes	Due to existing medical condition	I think the restrictions are not strict enough	Yes	Yes	Yes	Yes	Positively	Increased	Yes	Yes	Yes	Yes	Yes	Yes	Yes	Yes	Yes	2	2	4	3	3	3	3	3	3	4	30	0	3
22	Male	Oromia	Rural	Single	Yes	8	2000	5	Neonatal Nursing	2nd year	Social media	Correct and balanced	Yes	Yes	Yes	Every day or almost every day	Yes	Yes	Yes	Due to existing medical condition	I think the restrictions are not strict enough	Yes	Yes	Yes	Yes	Positively	Increased	Yes	Yes	Yes	Yes	Yes	Yes	Yes	Yes	Yes	2	4	3	3	3	2	2	3	4	4	30	2	3
22	Male	Oromia	Rural	Single	Yes	8	2000	5	Neonatal Nursing	2nd year	Social media	Correct and balanced	Yes	Yes	Yes	Every day or almost every day	Yes	Yes	Yes	Due to existing medical condition	I think the restrictions are not strict enough	Yes	Yes	Yes	Yes	Positively	Increased	Yes	Yes	Yes	Yes	Yes	Yes	Yes	Yes	Yes	2	4	3	3	3	2	2	3	4	4	30	2	3
22	Male	Oromia	Rural	Single	Yes	8	2000	5	Neonatal Nursing	2nd year	Social media	Correct and balanced	Yes	Yes	Yes	Every day or almost every day	Yes	Yes	Yes	Due to existing medical condition	I think the restrictions are not strict enough	Yes	Yes	Yes	Yes	Positively	Increased	Yes	Yes	Yes	Yes	Yes	Yes	Yes	Yes	Yes	2	4	3	3	3	2	2	3	4	4	30	2	3
22	Male	Oromia	Urban	Single	Yes	13	3000	5	Neonatal Nursing	2nd year	Social media;Mass media (TV, Radio)	Correct and balanced	Yes	Yes	Yes	Every day or almost every day	Yes	Yes	Yes	Due to existing medical condition	I think the restrictions are not strict enough	Yes	Yes	Yes	Yes	Positively	Increased	Yes	Yes	Yes	Yes	Yes	Yes	Yes	Yes	Yes	1	2	2	3	4	2	3	4	2	2	25	1	3
22	Male	Oromia	Urban	Single	Yes	13	3000	5	Neonatal Nursing	2nd year	Social media;Mass media (TV, Radio)	Correct and balanced	Yes	Yes	Yes	Every day or almost every day	Yes	Yes	Yes	Due to existing medical condition	I think the restrictions are not strict enough	Yes	Yes	Yes	Yes	Positively	Increased	Yes	Yes	Yes	Yes	Yes	Yes	Yes	Yes	Yes	1	2	2	3	4	2	3	4	2	2	25	1	3
27	Male	Oromia	Urban	Single	Yes	9	8000	6	Operational Theatre Nursing	2nd year	Mass media (TV, Radio)	Too much alarming	No	No	Yes	Several times a week	Yes	Yes	No		I think the restrictions are not strict enough	No	Yes	No	Yes	Negatively	Decreased	Yes	Yes	Yes	Yes	Yes	No	Yes	Yes	Yes	1	3	2	2	2	1	0	3	1	1	16	1	2
34	Female	Oromia	Urban	Single	Yes	3	10000	6	Operational Theatre Nursing	2nd year	Social media;Community (family, friends...)	Correct and balanced	Yes	Yes	Yes	Every day or almost every day	No	Yes	No		I think the restrictions are not strict enough	Yes	Yes	Yes	Yes	Positively	Decreased	Yes	Yes	Yes	Yes	Yes	Yes	Yes	Yes	Yes	2	0	3	3	3	0	3	0	3	3	20	1	3
32	Female	Oromia	Urban	Married	Yes	5	6000	6	Operational Theatre Nursing	2nd year	Social media and mass media	Too much alarming	Yes	Yes	Yes	Rarely	Yes	Yes	No	I donâ€™t know	I think the restrictions are too strict	Yes	No	No	No		Decreased	Yes	Yes	Yes	Yes	Yes	Yes	Yes	Yes	Yes	0	0	2	2	2	2	2	2	2	2	16	1	3
28	Female	Oromia	Rural	Married	Yes	6	4000	6	Operational Theatre Nursing	2nd year	Social media and mass media	Correct and balanced	Yes	Yes	Yes	Rarely	Yes	Yes	Yes	Due to work exposure	I think the restrictions are not strict enough	No	Yes	Yes	Yes	Positively	Decreased	Yes	No	Yes	Yes	No	No	Yes	Yes	No	4	3	3	3	3	1	3	3	2	3	28	2	4
29	Female	Oromia	Urban	Married	Yes	7	12000	6	Operational Theatre Nursing	2nd year	Social media and mass media	Too much alarming	Yes	Yes	Yes	About once a week	Yes	Yes	Yes	Due to work exposure	I think the restrictions are not strict enough	Yes	Yes	Yes	Yes	Positively	Not changed	Yes	Yes	Yes	Yes	Yes	Yes	Yes	Yes	Yes	0	0	1	0	2	1	2	2	3	1	12	1	1
22	Female	Oromia	Rural	Single	Yes	6	8000	7	Pharmacy	2nd year	Social media	Too much alarming	Yes	Yes	Yes	Every day or almost every day	Yes	Yes	Yes	Due to work exposure	I think the restrictions are not strict enough	No	Yes	No	Yes	Positively	Decreased	Yes	Yes	Yes	Yes	Yes	No	Yes	Yes	Yes	2	2	2	1	0	3	2	1	2	1	16	1	1
19	Female	Oromia	Urban	Single	Yes	4	20000	7	Pharmacy	2nd year	Social media and mass media	Too much alarming	Yes	Yes	Yes	Rarely	Yes	I don't know	Yes	I donâ€™t know	I think the restrictions are appropriate	No	No	Yes	Yes	Positively	Decreased	No	No	Yes	Yes	Yes	Yes	Yes	Yes	Yes	3	3	4	0	0	3	3	0	4	1	21	2	4
21	Male	Oromia	Rural	Single	Yes	5	1000	7	Pharmacy	2nd year	Social media and mass media	Too much alarming	Yes	Yes	Yes	Rarely	Yes	Yes	No		I think the restrictions are not strict enough	No	Yes	No	Yes	Negatively	Decreased	Yes	No	Yes	Yes	Yes	No	No	No	Yes	3	2	3	2	0	1	2	0	3	2	18	1	2
20	Female	Addis Abeba	Urban	Single	Yes	5	35000	7	Pharmacy	2nd year	Social media and mass media	Correct and balanced	Yes	Yes	Yes	Every day or almost every day	Yes	No	No		I think the restrictions are not strict enough	No	Yes	No	No		Not changed	No	No	Yes	Yes	No	Yes	Yes	Yes	Yes	0	0	0	4	3	1	4	3	0	0	15	0	2
19	Male	Oromia	Urban	Single	Yes	7	1000	7	Pharmacy	2nd year	Social media and mass media	Correct and balanced	No	No	Yes	About once a week	Yes	I don't know	No		I think the restrictions are appropriate	No	No	No	No		Decreased	Yes	Yes	Yes	Yes	No	Yes	Yes	Yes	Yes	3	2	2	4	3	2	3	2	4	3	28	2	3
20	Male	Oromia	Urban	Single	Yes	7	200	7	Pharmacy	2nd year	Mass media (TV, Radio)	Correct and balanced	No	No	Yes	Several times a week	Yes	Yes	No	Due to work exposure	I think the restrictions are appropriate	No	No	Yes	Yes	Positively	Decreased	Yes	No	Yes	Yes	Yes	No	Yes	Yes	Yes	4	2	2	2	1	1	2	1	1	1	17	1	2
20	Male	Oromia	Urban	Single	Yes	7	2000	7	Pharmacy	2nd year	Mass media (TV, Radio)	Correct and balanced	Yes	Yes	Yes	Several times a week	No	Yes	No	Due to work exposure	I think the restrictions are too strict	Yes	Yes	No	Yes	Positively	Decreased	Yes	Yes	Yes	Yes	Yes	Yes	Yes	Yes	Yes	1	3	1	2	2	2	1	1	1	4	18	0	2
20	Female	Southern Nation, Nationalities and People Region (SNNPR)	Urban	Single	Yes	7	5000	7	Pharmacy	2nd year	Mass media (TV, Radio)	Correct and balanced	Yes	Yes	Yes	Every day or almost every day	Yes	I don't know	No		I think the restrictions are appropriate	Yes	Yes	Yes	Yes	Negatively	Decreased	Yes	Yes	Yes	Yes	Yes	Yes	Yes	Yes	Yes	3	3	3	3	3	3	3	3	0	2	26	2	3
20	Female	Southern Nation, Nationalities and People Region (SNNPR)	Urban	Single	Yes	7	5000	7	Pharmacy	2nd year	Mass media (TV, Radio)	Correct and balanced	Yes	Yes	Yes	Several times a week	Yes	I don't know	Yes	I donâ€™t know	I think the restrictions are appropriate	Yes	Yes	Yes	Yes	Negatively	Decreased	Yes	Yes	Yes	Yes	Yes	Yes	Yes	Yes	Yes	3	3	3	3	3	3	3	3	3	3	30	1	3
21	Male	Oromia	Urban	Single	Yes	5	1	7	Pharmacy	2nd year	Social media and mass media	Correct and balanced	Yes	Yes	Yes	About once a week	Yes	Yes	No		I think the restrictions are not strict enough	No	No	Yes	Yes	Positively	Decreased	Yes	Yes	Yes	Yes	Yes	Yes	Yes	Yes	Yes	3	4	3	3	2	4	2	1	2	3	27	2	2
22	Female	Addis Abeba	Urban	Single	Yes	4	1	0	Anesthesia	3rd year	Mass media (TV, Radio)	Too much alarming	Yes	No	No	About once a week	Yes	Yes	Yes	Due to existing medical condition	I think the restrictions are not strict enough	No	No	Yes	Yes	Positively	Decreased	No	Yes	Yes	Yes	No	Yes	Yes	Yes	Yes	4	4	3	1	0	4	1	0	4	4	25	2	1
23	Female	Addis Abeba	Rural	Single	Yes	3	10000	0	Anesthesia	3rd year	Social media and mass media	Too much alarming	Yes	Yes	Yes	About once a week	No	I don't know	No		I think the restrictions are not strict enough	Yes	No	No	Yes	Positively	Decreased	Yes	Yes	Yes	Yes	Yes	Yes	Yes	Yes	Yes	4	4	3	3	3	3	3	2	4	3	32	2	2
21	Female	Addis Abeba	Urban	Single	Yes	7	1	0	Anesthesia	3rd year	Social media and mass media	Correct and balanced	Yes	Yes	Yes	Several times a week	Yes	No	Yes	Due to existing medical condition;Due to work exposure	I think the restrictions are appropriate	No	No	No	Yes	Positively	Not changed	Yes	Yes	Yes	Yes	Yes	Yes	Yes	Yes	Yes	2	2	3	2	1	2	1	1	2	1	17	1	3
21	Female	Oromia	Urban	Single	Yes	4	3500	0	Anesthesia	3rd year	Mass media (TV, Radio)	Correct and balanced	Yes	Yes	Yes	About once a week	I don't know	No	No		I think the restrictions are not strict enough	No	No	Yes	Yes	Positively	Decreased	Yes	Yes	Yes	Yes	Yes	No	Yes	Yes	Yes	1	0	1	4	3	2	3	3	1	0	18	2	3
22	Female	Addis Abeba	Urban	Single	Yes	12	1	0	Anesthesia	3rd year	Social media and mass media;Community (family, friends...)	Too much alarming	Yes	Yes	Yes	Rarely	Yes	Yes	No		I think the restrictions are not strict enough	No	Yes	Yes	Yes	Positively	Decreased	Yes	Yes	Yes	Yes	Yes	Yes	Yes	Yes	Yes	1	2	1	3	0	2	3	2	1	1	16	1	2
21	Male	Oromia	Urban	Single	Yes	9	2000	0	Anesthesia	3rd year	Mass media (TV, Radio)	Hide reality not to scare	Yes	Yes	Yes	About once a week	Yes	Yes	Yes	Due to existing medical condition;Due to work exposure;Less execution of measures	I think the restrictions are not strict enough	Yes	Yes	Yes	Yes	Negatively	Decreased	No	Yes	Yes	Yes	No	Yes	Yes	Yes	Yes	4	4	4	2	2	3	3	2	4	4	32	0	4
21	Female	Oromia	Urban	Single	Yes	4	12000	0	Anesthesia	3rd year	Social media and mass media	Hide reality not to scare	Yes	Yes	Yes	Rarely	Yes	Yes	No		I think the restrictions are not strict enough	Yes	Yes	No	Yes	Positively	Increased	Yes	Yes	Yes	Yes	Yes	Yes	Yes	Yes	Yes	4	4	4	4	2	3	2	3	4	4	34	2	4
21	Male	Oromia	Rural	Single	Yes	10	1000	0	Anesthesia	3rd year	Social media	Hide reality not to scare	Yes	Yes	Yes	Several times a week	Yes	Yes	No		I think the restrictions are not strict enough	No	No	Yes	Yes	Positively	Not changed	No	No	Yes	Yes	Yes	No	Yes	No	Yes	3	2	3	4	2	2	4	3	3	2	28	2	4
21	Female	Oromia	Urban	Single	Yes	6	1	0	Anesthesia	3rd year	Mass media (TV, Radio)	Correct and balanced	Yes	Yes	Yes	Several times a week	Yes	No	No		I think the restrictions are appropriate	No	No	No	Yes	Positively	Not changed	Yes	No	Yes	Yes	No	Yes	Yes	Yes	Yes	1	3	2	2	1	2	3	1	1	1	17	1	3
20	Male	Oromia	Urban	Single	Yes	4	10000	0	Anesthesia	3rd year	Mass media (TV, Radio)	Correct and balanced	Yes	Yes	Yes	Several times a week	Yes	Yes	Yes	I donâ€™t know	I think the restrictions are appropriate	No	Yes	No	No		Not changed	Yes	No	Yes	Yes	No	Yes	Yes	Yes	Yes	0	2	1	3	2	4	2	2	3	0	19	1	2
20	Female	Addis Abeba	Urban	Single	Yes	5	10000	0	Anesthesia	3rd year	Social media and mass media	Too much alarming	Yes	Yes	Yes	Every day or almost every day	Yes	Yes	Yes	Due to work exposure	I think the restrictions are not strict enough	No	Yes	Yes	Yes	Negatively	Decreased	Yes	Yes	Yes	Yes	Yes	No	Yes	Yes	Yes	4	4	1	3	0	4	3	0	4	3	26	2	4
20	Male	Oromia	Rural	Single	No	18	200	0	Anesthesia	3rd year	Mass media (TV, Radio)	Correct and balanced	Yes	Yes	Yes	Rarely	Yes	Yes	Yes	Due to work exposure	I think the restrictions are appropriate	No	Yes	No	Yes	Negatively	Decreased	Yes	Yes	Yes	Yes	Yes	Yes	Yes	Yes	Yes	3	4	3	2	3	3	4	3	3	3	31	1	3
26	Male	Gambella	Urban	Married	No	3	500	0	Anesthesia	3rd year	Social media	Too much alarming	Yes	Yes	Yes	Every day or almost every day	Yes	Yes	Yes	Due to existing medical condition	I think the restrictions are appropriate	No	No	Yes	Yes	Positively	Decreased	Yes	Yes	Yes	Yes	Yes	Yes	Yes	Yes	Yes	2	2	2	2	2	2	2	2	2	2	20	1	2
26	Male	Gambella	Urban	Married	No	3	500	0	Anesthesia	3rd year	Social media	Too much alarming	Yes	Yes	Yes	Several times a week	Yes	Yes	Yes	Due to existing medical condition	I think the restrictions are appropriate	No	Yes	Yes	Yes	Positively	Decreased	Yes	Yes	Yes	Yes	Yes	Yes	Yes	Yes	Yes	2	2	2	2	2	2	2	2	2	2	20	2	2
25	Male	Oromia	Rural	Single	Yes	4	500	0	Anesthesia	3rd year	Mass media (TV, Radio)	Correct and balanced	Yes	Yes	Yes	About once a week	Yes	No	No		I think the restrictions are not strict enough	No	Yes	No	No		Decreased	No	No	Yes	Yes	Yes	No	No	No	Yes	0	1	1	1	1	1	1	1	1	1	9	1	3
25	Male	Oromia	Rural	Single	Yes	4	5000	0	Anesthesia	3rd year	Social media	Correct and balanced	Yes	Yes	Yes	Several times a week	I don't know	No	No	I donâ€™t know	I think the restrictions are not strict enough	No	No	No	Yes	Positively	Decreased	No	Yes	Yes	Yes	Yes	Yes	Yes	Yes	Yes	1	1	2	2	2	2	2	2	2	2	18	1	2
21	Male	Oromia	Urban	Single	Yes	5	8000	1	Eniviromental Health	3rd year	Social media	Too much alarming	Yes	Yes	Yes	Rarely	Yes	Yes	Yes	Due to work exposure	I think the restrictions are not strict enough	No	Yes	No	No		Not changed	No	No	Yes	Yes	No	Yes	Yes	Yes	Yes	4	3	4	4	3	3	3	2	0	1	27	2	1
21	Female	Oromia	Urban	Single	Yes	6	13000	1	Eniviromental Health	3rd year	Social media and mass media	Correct and balanced	Yes	Yes	Yes	Several times a week	I don't know	Yes	Yes	Due to work exposure	I think the restrictions are not strict enough	No	Yes	Yes	Yes	Positively	Decreased	Yes	Yes	Yes	Yes	Yes	Yes	Yes	Yes	Yes	3	2	3	3	2	2	2	1	4	2	24	2	4
22	Female	Oromia	Urban	Single	Yes	6	1	1	Eniviromental Health	3rd year	Social media and mass media	Too much alarming	Yes	Yes	No	Every day or almost every day	Yes	Yes	Yes	I donâ€™t know	I think the restrictions are not strict enough	Yes	Yes	Yes	Yes	Positively	Decreased	Yes	Yes	Yes	Yes	Yes	No	Yes	Yes	Yes	2	2	2	2	2	3	3	1	2	2	21	1	2
22	Male	Southern Nation, Nationalities and People Region (SNNPR)	Rural	Single	Yes	10	2000	1	Eniviromental Health	3rd year	Social media and mass media	Too much alarming	Yes	Yes	Yes	Rarely	Yes	No	No		I think the restrictions are not strict enough	Yes	Yes	Yes	Yes	Negatively	Decreased	Yes	Yes	Yes	Yes	Yes	Yes	Yes	Yes	Yes	3	4	4	4	4	4	4	4	4	4	39	2	1
21	Male	Addis Abeba	Urban	Single	Yes	4	7000	2	Generic nursing	3rd year	Social media and mass media	Correct and balanced	No	No	Yes	Every day or almost every day	Yes	No	Yes	Due to work exposure	I think the restrictions are not strict enough	No	Yes	No	No		Not changed	Yes	Yes	Yes	Yes	Yes	Yes	Yes	Yes	Yes	0	0	0	4	4	0	3	4	1	1	17	1	3
21	Female	Oromia	Urban	Single	Yes	3	10000	2	Generic nursing	3rd year	Social media and mass media	Too much alarming	Yes	Yes	Yes	Every day or almost every day	Yes	Yes	Yes	Due to work exposure	I think the restrictions are not strict enough	Yes	No	No	Yes	Positively	Not changed	Yes	Yes	Yes	Yes	Yes	Yes	Yes	Yes	Yes	4	4	4	0	0	0	0	4	4	4	24	2	4
24	Male	Oromia	Rural	Single	Yes	5	7000	2	Generic nursing	3rd year	Mass media (TV, Radio)	Correct and balanced	Yes	Yes	Yes	Several times a week	Yes	Yes	Yes	Due to work exposure	I think the restrictions are not strict enough	No	Yes	Yes	Yes	Positively	Decreased	Yes	No	Yes	Yes	Yes	Yes	Yes	Yes	Yes	4	4	4	4	4	3	2	2	2	2	31	1	3
21	Female	Oromia	Urban	Single	Yes	5	7000	2	Generic nursing	3rd year	Mass media (TV, Radio)	Too much alarming	Yes	Yes	No	Several times a week	Yes	Yes	No		I think the restrictions are too strict	Yes	Yes	Yes	Yes	Positively	Increased	Yes	Yes	Yes	No	Yes	Yes	Yes	Yes	Yes	3	2	1	2	2	3	1	3	2	2	21	0	3
21	Female	Sidama	Urban	Single	Yes	4	1	2	Generic nursing	3rd year	Social media and mass media	Correct and balanced	Yes	Yes	Yes	Every day or almost every day	Yes	Yes	Yes	Due to existing medical condition;Due to work exposure	I think the restrictions are appropriate	No	Yes	No	Yes	Negatively	Not changed	Yes	Yes	Yes	Yes	Yes	Yes	Yes	Yes	Yes	3	3	3	3	3	2	2	3	4	3	29	1	4
22	Male	Oromia	Urban	Single	Yes	5	10000	2	Generic nursing	3rd year	Social media and mass media	Hide reality not to scare	No	Yes	No	Rarely	Yes	No	No		I think the restrictions are not strict enough	No	Yes	Yes	Yes	Positively	Decreased	No	No	No	No	No	No	No	No	No	0	0	2	1	2	1	1	2	2	1	12	0	4
23	Female	Sidama	Urban	Single	Yes	7	10000	2	Generic nursing	3rd year	Social media and mass media	Too much alarming	Yes	Yes	Yes	Every day or almost every day	Yes	No	No		I think the restrictions are not strict enough	Yes	No	No	Yes	Positively	Not changed	Yes	Yes	Yes	Yes	Yes	Yes	Yes	Yes	Yes	3	1	0	4	1	0	0	0	1	0	10	2	3
22	Female	Addis Abeba	Urban	Single	Yes	5	20000	2	Generic nursing	3rd year	Social media and mass media	Correct and balanced	No	No	Yes	Several times a week	Yes	No	Yes	Due to work exposure;I donâ€™t know	I think the restrictions are appropriate	No	No	No	No		Not changed	Yes	Yes	Yes	Yes	Yes	Yes	Yes	Yes	Yes	3	3	3	2	2	2	3	2	3	3	26	0	3
21	Male	Oromia	Urban	Single	Yes	5	1	2	Generic nursing	3rd year	Social media and mass media	Correct and balanced	No	No	Yes	Every day or almost every day	Yes	Yes	No		I think the restrictions are appropriate	Yes	Yes	Yes	No		Not changed	Yes	Yes	Yes	Yes	Yes	Yes	Yes	Yes	Yes	2	2	2	3	2	2	3	2	3	3	24	1	3
21	Female	Sidama	Urban	Single	Yes	8	15000	2	Generic nursing	3rd year	Social media and mass media	Correct and balanced	Yes	Yes	Yes	Every day or almost every day	Yes	Yes	Yes	Due to existing medical condition;Due to work exposure	I think the restrictions are not strict enough	No	No	Yes	Yes	Positively	Decreased	Yes	No	Yes	Yes	Yes	Yes	Yes	Yes	Yes	2	0	1	1	2	1	1	3	1	0	12	0	3
22	Female	Sidama	Urban	Single	Yes	8	3500	2	Generic nursing	3rd year	Mass media (TV, Radio)	Correct and balanced	No	No	Yes	About once a week	Yes	Yes	Yes	Due to existing medical condition	I think the restrictions are not strict enough	No	No	Yes	Yes	Positively	Not changed	Yes	Yes	Yes	Yes	Yes	Yes	Yes	Yes	Yes	2	3	2	2	1	2	3	1	3	2	21	1	3
21	Female	Addis Abeba	Urban	Single	Yes	6	10000	2	Generic nursing	3rd year	Social media and mass media	Correct and balanced	Yes	Yes	Yes	Several times a week	Yes	Yes	Yes	Due to existing medical condition	I think the restrictions are not strict enough	Yes	Yes	Yes	Yes	Positively	Decreased	Yes	Yes	Yes	Yes	Yes	Yes	Yes	Yes	Yes	2	2	2	2	2	3	4	4	3	4	28	2	3
20	Male	Southern Nation, Nationalities and People Region (SNNPR)	Urban	Single	Yes	6	14000	2	Generic nursing	3rd year	Social media and mass media;Community (family, friends...)	Too much alarming	Yes	Yes	Yes	About once a week	Yes	I don't know	No		I think the restrictions are not strict enough	No	Yes	Yes	Yes	Positively	Not changed	Yes	Yes	Yes	Yes	Yes	Yes	Yes	No	Yes	2	3	4	4	3	2	3	3	2	2	28	1	3
21	Female	Addis Abeba	Urban	Single	Yes	6	10000	2	Generic nursing	3rd year	Social media and mass media	Correct and balanced	Yes	Yes	Yes	Several times a week	Yes	Yes	Yes	Due to existing medical condition;Due to work exposure	I think the restrictions are not strict enough	Yes	Yes	Yes	Yes	Positively	Decreased	Yes	Yes	Yes	Yes	Yes	Yes	Yes	Yes	Yes	2	2	4	2	3	2	2	2	3	2	24	1	1
23	Female	Diredewa	Rural	Single	Yes	3	10000	2	Generic nursing	3rd year	Social media and mass media	Correct and balanced	No	No	Yes	Every day or almost every day	No	No	No		I think the restrictions are appropriate	No	No	No	Yes	Positively	Decreased	Yes	Yes	Yes	Yes	Yes	Yes	Yes	Yes	Yes	2	2	0	4	4	0	4	4	2	0	22	2	4
21	Male	Southern Nation, Nationalities and People Region (SNNPR)	Urban	Single	Yes	7	9000	2	Generic nursing	3rd year	Social media	Hide reality not to scare	Yes	Yes	Yes	Rarely	Yes	I don't know	No		I think the restrictions are appropriate	No	Yes	No	No		Not changed	No	No	Yes	Yes	No	Yes	Yes	Yes	Yes	1	1	2	4	3	1	2	2	1	0	17	1	3
21	Male	Southern Nation, Nationalities and People Region (SNNPR)	Urban	Single	Yes	7	9000	2	Generic nursing	3rd year	Social media	Hide reality not to scare	Yes	Yes	Yes	Rarely	Yes	I don't know	No		I think the restrictions are appropriate	No	Yes	No	No		Not changed	No	No	Yes	Yes	No	Yes	Yes	Yes	Yes	1	1	2	4	3	1	2	2	1	0	17	1	3
21	Female	Oromia	Rural	Single	Yes	5	5000	2	Generic nursing	3rd year	Mass media (TV, Radio)	Too much alarming	No	No	Yes	Every day or almost every day	Yes	No	No		I think the restrictions are not strict enough	Yes	No	No	No		Not changed	Yes	Yes	Yes	Yes	Yes	Yes	Yes	Yes	Yes	2	2	2	1	1	1	2	1	2	1	15	1	2
25	Male	Oromia	Urban	Single	Yes	5	1500	2	Generic nursing	3rd year	Social media	Too much alarming	No	Yes	Yes	Every day or almost every day	Yes	Yes	No	Due to existing medical condition	I think the restrictions are not strict enough	No	No	No	No	Positively	Increased	Yes	Yes	No	Yes	Yes	Yes	Yes	No	No	2	2	0	1	3	4	2	2	2	2	20	1	2
25	Male	Oromia	Urban	Single	Yes	5	2000	2	Generic nursing	3rd year	Social media	Too much alarming	No	No	Yes	Every day or almost every day	Yes	Yes	No	Due to work exposure	I think the restrictions are not strict enough	Yes	No	No	No	Positively	Increased	Yes	Yes	Yes	No	No	No	No	Yes	Yes	2	3	2	2	2	2	2	3	2	2	22	2	4
20	Female	Oromia	Urban	Single	Yes	14	1	2	Generic nursing	3rd year	Social media	Hide reality not to scare	Yes	Yes	Yes	About once a week	Yes	No	No	I donâ€™t know	I think the restrictions are too strict	Yes	Yes	Yes	Yes	Positively	Decreased	Yes	Yes	Yes	Yes	Yes	Yes	Yes	Yes	Yes	2	2	3	3	3	2	2	2	2	2	23	2	2
23	Male	Amhara	Rural	Single	Yes	10	2000	2	Generic nursing	3rd year	Social media	Correct and balanced	No	No	Yes	Rarely	Yes	No	Yes	Less execution of measures	I think the restrictions are appropriate	No	No	No	No		Not changed	Yes	Yes	Yes	Yes	Yes	Yes	Yes	Yes	Yes	1	2	2	3	2	1	3	1	1	1	17	0	3
21	Male	Oromia	Urban	Single	Yes	4	10000	3	Generic Midwifey	3rd year	Social media and mass media	Hide reality not to scare	Yes	Yes	Yes	Rarely	Yes	Yes	Yes	Due to existing medical condition;Due to work exposure;Less execution of measures	I think the restrictions are not strict enough	Yes	Yes	No	Yes	Negatively	Decreased	Yes	No	Yes	Yes	No	No	Yes	Yes	Yes	4	4	3	2	1	3	2	1	3	3	26	1	3
22	Female	Oromia	Urban	Single	Yes	3	10000	3	Generic Midwifey	3rd year	Social media and mass media	Too much alarming	Yes	Yes	Yes	Every day or almost every day	Yes	Yes	No		I think the restrictions are not strict enough	Yes	Yes	Yes	Yes	Negatively	Decreased	Yes	No	Yes	Yes	No	No	Yes	Yes	No	4	4	4	2	2	4	2	4	4	4	34	2	1
21	Male	Oromia	Urban	Single	Yes	6	9000	3	Generic Midwifey	3rd year	Social media	Too much alarming	Yes	No	Yes	About once a week	No	Yes	Yes	Due to work exposure	I think the restrictions are not strict enough	Yes	Yes	Yes	Yes	Positively	Decreased	Yes	Yes	Yes	No	Yes	Yes	Yes	Yes	Yes	0	2	2	3	4	4	4	3	4	2	28	0	3
23	Female	Oromia	Urban	Single	Yes	8	1	3	Generic Midwifey	3rd year	Social media and mass media	Too much alarming	Yes	Yes	No	About once a week	Yes	Yes	No		I think the restrictions are not strict enough	No	No	No	Yes	Positively	Decreased	Yes	Yes	Yes	Yes	Yes	Yes	Yes	Yes	Yes	3	3	2	2	0	2	3	2	3	2	22	1	4
20	Male	Oromia	Rural	Single	Yes	10	200	3	Generic Midwifey	3rd year	Social media and mass media	Hide reality not to scare	Yes	Yes	Yes	Rarely	Yes	Yes	No		I think the restrictions are not strict enough	Yes	No	Yes	Yes	Negatively	Decreased	Yes	Yes	Yes	Yes	Yes	Yes	Yes	Yes	Yes	4	2	2	3	3	4	1	1	3	3	26	0	3
21	Male	Addis Abeba	Urban	Single	Yes	8	7500	3	Generic Midwifey	3rd year	Social media and mass media	Too much alarming	No	Yes	Yes	Several times a week	Yes	No	Yes	Due to existing medical condition	I think the restrictions are not strict enough	No	Yes	No	No		Increased	Yes	Yes	Yes	Yes	No	Yes	Yes	Yes	Yes	2	0	2	4	4	0	4	4	0	0	20	0	1
22	Male	Oromia	Rural	Single	Yes	5	500	3	Generic Midwifey	3rd year	Social media and mass media	Too much alarming	Yes	Yes	Yes	Rarely	Yes	Yes	Yes	Due to work exposure	I think the restrictions are not strict enough	No	Yes	Yes	Yes	Positively	Decreased	Yes	Yes	Yes	Yes	No	No	Yes	Yes	Yes	3	3	4	3	2	3	0	1	3	2	24	0	4
21	Female	Oromia	Urban	Single	Yes	4	5000	3	Generic Midwifey	3rd year	Social media and mass media	Correct and balanced	Yes	Yes	Yes	Rarely	Yes	Yes	Yes	Due to work exposure	I think the restrictions are appropriate	No	No	Yes	Yes	Positively	Increased	Yes	Yes	Yes	Yes	Yes	Yes	Yes	Yes	Yes	2	4	2	4	4	4	3	4	4	3	34	2	4
23	Female	Oromia	Rural	Single	Yes	7	1000	3	Generic Midwifey	3rd year	Social media	Too much alarming	Yes	Yes	Yes	About once a week	No	Yes	No		I think the restrictions are appropriate	Yes	Yes	No	No		Not changed	Yes	Yes	Yes	No	Yes	Yes	No	Yes	Yes	0	1	0	0	0	0	1	0	0	2	4	1	2
22	Female	Oromia	Urban	Married	Yes	8	10000	3	Generic Midwifey	3rd year	Social media	Too much alarming	Yes	Yes	No	About once a week	Yes	Yes	No	I donâ€™t know	I think the restrictions are appropriate	Yes	Yes	No	Yes	Positively	Decreased	Yes	Yes	Yes	No	Yes	Yes	No	Yes	Yes	2	2	3	2	1	2	1	0	2	2	17	0	2
24	Male	Oromia	Urban	Single	Yes	3	1	3	Generic Midwifey	3rd year	Social media and mass media	Correct and balanced	Yes	Yes	No	About once a week	Yes	I don't know	No	I donâ€™t know	I think the restrictions are appropriate	Yes	Yes	No	Yes	Positively	Decreased	Yes	Yes	Yes	Yes	Yes	Yes	Yes	Yes	Yes	3	2	1	2	1	0	0	0	0	0	9	0	2
22	Male	Oromia	Urban	Single	Yes	5	5000	4	Medical labratory	3rd year	Social media	Too much alarming	No	Yes	Yes	About once a week	Yes	No	Yes	Due to work exposure	I think the restrictions are not strict enough	No	Yes	Yes	Yes	Positively	Decreased	No	Yes	Yes	Yes	Yes	No	Yes	Yes	Yes	4	2	2	2	1	2	2	1	2	1	19	1	2
21	Male	Southern Nation, Nationalities and People Region (SNNPR)	Urban	Single	Yes	8	3000	4	Medical labratory	3rd year	Social media	Hide reality not to scare	No	Yes	Yes	Several times a week	Yes	No	No		I think the restrictions are not strict enough	No	No	Yes	Yes	Positively	Decreased	Yes	Yes	Yes	Yes	Yes	No	Yes	Yes	Yes	2	0	2	3	2	0	1	2	2	0	14	2	4
21	Male	Oromia	Urban	Single	Yes	6	1	4	Medical labratory	3rd year	Mass media (TV, Radio)	Hide reality not to scare	Yes	Yes	Yes	Rarely	Yes	No	Yes	Due to existing medical condition;Due to work exposure	I think the restrictions are appropriate	No	No	Yes	Yes	Positively	Decreased	Yes	No	Yes	Yes	Yes	Yes	Yes	Yes	Yes	1	3	1	3	1	3	1	1	3	1	18	0	3
21	Female	Oromia	Urban	Single	Yes	4	6000	4	Medical labratory	3rd year	Social media and mass media	Correct and balanced	Yes	Yes	Yes	Several times a week	Yes	Yes	No		I think the restrictions are appropriate	Yes	Yes	Yes	Yes	Negatively	Not changed	Yes	Yes	Yes	Yes	Yes	Yes	Yes	Yes	Yes	2	1	2	2	2	1	3	0	3	3	19	0	3
21	Male	Oromia	Urban	Single	Yes	7	20000	4	Medical labratory	3rd year	Social media and mass media	Correct and balanced	No	No	Yes	Rarely	Yes	Yes	Yes	Due to work exposure	I think the restrictions are not strict enough	No	Yes	Yes	Yes	Negatively	Not changed	Yes	No	No	No	No	No	No	No	No	4	4	0	3	0	4	0	0	4	4	23	1	2
23	Male	Oromia	Urban	Single	No	8	2000	4	Medical labratory	3rd year	Social media	Correct and balanced	Yes	Yes	Yes	Rarely	Yes	Yes	No		I think the restrictions are not strict enough	Yes	Yes	No	No		Not changed	Yes	No	Yes	Yes	Yes	Yes	Yes	Yes	Yes	2	3	2	3	2	2	3	3	3	3	26	1	2
29	Male	Oromia	Rural	Married	Yes	5	4000	5	Neonatal Nursing	3rd year	Mass media (TV, Radio)	Too much alarming	No	No	Yes	Every day or almost every day	Yes	Yes	Yes	Due to work exposure	I think the restrictions are not strict enough	No	Yes	Yes	Yes	Positively	Decreased	Yes	Yes	Yes	Yes	Yes	Yes	Yes	Yes	Yes	4	3	3	3	3	3	2	3	2	2	28	2	2
28	Female	Oromia	Urban	Married	Yes	2	5000	5	Neonatal Nursing	3rd year	Mass media (TV, Radio)	Too much alarming	Yes	Yes	Yes	Several times a week	Yes	Yes	Yes	Due to work exposure	I think the restrictions are not strict enough	No	No	Yes	Yes	Positively	Decreased	Yes	Yes	Yes	Yes	Yes	Yes	Yes	Yes	Yes	4	3	3	4	4	2	4	3	3	1	31	1	4
29	Male	Oromia	Rural	Married	Yes	4	3000	6	Operational Theatre Nursing	3rd year	Social media;Mass media (TV, Radio);Social media and mass media	Correct and balanced	Yes	Yes	Yes	Several times a week	Yes	Yes	Yes	Due to work exposure	I think the restrictions are not strict enough	No	Yes	Yes	Yes	Negatively	Decreased	Yes	Yes	Yes	Yes	Yes	Yes	Yes	Yes	Yes	1	1	3	0	0	0	0	0	0	0	5	1	1
25	Female	Oromia	Urban	Single	Yes	6	7000	6	Operational Theatre Nursing	3rd year	Social media and mass media	Correct and balanced	Yes	Yes	Yes	About once a week	Yes	Yes	Yes	Due to existing medical condition	I think the restrictions are appropriate	No	No	Yes	Yes	Positively	Not changed	Yes	Yes	Yes	Yes	Yes	No	Yes	Yes	Yes	2	1	4	2	2	2	3	1	2	2	21	1	2
20	Male	Oromia	Urban	Single	Yes	6	8000	7	Pharmacy	3rd year	Social media and mass media	Too much alarming	No	No	Yes	About once a week	Yes	I don't know	Yes	Less execution of measures	I think the restrictions are not strict enough	No	Yes	Yes	Yes	Positively	Decreased	No	No	Yes	Yes	Yes	Yes	Yes	Yes	Yes	0	2	2	2	2	2	2	2	2	2	18	1	1
20	Male	Oromia	Rural	Single	Yes	7	17500	7	Pharmacy	3rd year	Social media and mass media	Too much alarming	Yes	Yes	Yes	Rarely	Yes	Yes	No		I think the restrictions are appropriate	Yes	Yes	Yes	Yes	Negatively	Decreased	No	No	No	Yes	No	No	Yes	No	Yes	4	4	4	3	3	3	2	0	4	4	31	2	3
22	Female	Oromia	Urban	Single	Yes	5	15000	7	Pharmacy	3rd year	Social media and mass media	Correct and balanced	Yes	Yes	Yes	Several times a week	Yes	Yes	Yes	Due to work exposure	I think the restrictions are not strict enough	No	Yes	Yes	Yes	Negatively	Not changed	Yes	Yes	Yes	Yes	No	No	Yes	Yes	Yes	4	3	3	2	4	3	2	3	3	3	30	2	1
22	Male	Oromia	Urban	Single	Yes	6	1	7	Pharmacy	3rd year	Social media	Correct and balanced	No	Yes	Yes	Rarely	Yes	Yes	Yes	Due to work exposure	I think the restrictions are not strict enough	No	No	Yes	Yes	Positively	Decreased	Yes	No	Yes	Yes	No	No	Yes	No	Yes	4	4	2	4	2	4	2	1	4	4	31	1	4
22	Male	Oromia	Urban	Single	Yes	5	10000	7	Pharmacy	3rd year	Social media and mass media	Correct and balanced	No	Yes	Yes	Rarely	Yes	Yes	Yes	Due to existing medical condition;Due to work exposure	I think the restrictions are appropriate	No	Yes	Yes	Yes	Negatively	Not changed	No	No	No	No	No	No	Yes	Yes	Yes	2	2	3	2	1	3	3	2	3	1	22	1	1
22	Female	Oromia	Urban	Single	Yes	6	10000	7	Pharmacy	3rd year	Mass media (TV, Radio)	Too much alarming	Yes	Yes	No	Rarely	Yes	Yes	No		I think the restrictions are not strict enough	No	Yes	No	Yes	Positively	Decreased	Yes	Yes	Yes	Yes	Yes	Yes	Yes	Yes	Yes	2	1	4	1	0	0	0	0	2	0	10	2	4
23	Female	Addis Abeba	Urban	Single	Yes	5	10000	7	Pharmacy	3rd year	Social media	Too much alarming	No	Yes	Yes	Rarely	Yes	No	No		I think the restrictions are too strict	No	No	No	Yes	Positively	Decreased	Yes	Yes	Yes	Yes	Yes	Yes	Yes	Yes	Yes	2	2	2	2	2	2	2	2	2	2	20	1	3
23	Female	Addis Abeba	Urban	Single	Yes	5	10000	7	Pharmacy	3rd year	Social media and mass media	Too much alarming	No	Yes	Yes	About once a week	I don't know	No	No	I donâ€™t know	I think the restrictions are too strict	No	No	No	No	Positively	Decreased	Yes	Yes	Yes	Yes	Yes	Yes	Yes	Yes	Yes	2	2	2	2	2	2	2	2	2	2	20	1	3
21	Male	Oromia	Rural	Single	Yes	6	200	7	Pharmacy	3rd year	Social media	Correct and balanced	Yes	Yes	Yes	Rarely	Yes	Yes	Yes	Due to existing medical condition	I think the restrictions are appropriate	Yes	No	Yes	Yes	Positively	Decreased	Yes	Yes	Yes	Yes	Yes	Yes	Yes	Yes	Yes	3	2	1	4	3	2	1	2	0	1	19	1	3
23	Male	Oromia	Rural	Single	Yes	9	10000	0	Anesthesia	4th year	Social media	Correct and balanced	No	No	Yes	Several times a week	Yes	Yes	No		I think the restrictions are not strict enough	No	No	Yes	Yes	Negatively	Decreased	Yes	Yes	Yes	Yes	Yes	Yes	Yes	Yes	Yes	4	4	4	0	0	4	0	1	4	4	25	2	3
24	Male	Oromia	Rural	Single	Yes	8	6000	0	Anesthesia	4th year	Social media;Community (family, friends...)	Too much alarming	No	Yes	Yes	Several times a week	Yes	Yes	No		I think the restrictions are appropriate	Yes	Yes	No	No		Increased	No	No	Yes	No	No	No	No	No	No	2	2	1	4	1	2	3	3	1	1	20	1	4
24	Male	Oromia	Urban	Single	Yes	6	10000	0	Anesthesia	4th year	Social media and mass media	Correct and balanced	Yes	Yes	No	About once a week	Yes	Yes	Yes	Due to work exposure	I think the restrictions are not strict enough	No	No	Yes	Yes	Positively	Decreased	Yes	Yes	Yes	Yes	Yes	Yes	No	Yes	Yes	0	2	2	3	1	2	2	3	2	2	19	2	1
22	Male	Oromia	Rural	Single	Yes	8	10000	0	Anesthesia	4th year	Social media and mass media	Correct and balanced	Yes	Yes	Yes	Several times a week	Yes	Yes	No		I think the restrictions are not strict enough	Yes	Yes	No	No		Not changed	Yes	Yes	Yes	Yes	Yes	Yes	Yes	Yes	Yes	3	4	4	3	0	2	2	3	4	3	28	1	1
23	Female	Addis Abeba	Urban	Single	Yes	4	1	1	Eniviromental Health	4th year	Social media and mass media	Correct and balanced	Yes	Yes	Yes	Several times a week	No	No	No		I think the restrictions are not strict enough	No	No	No	Yes	Positively	Decreased	Yes	Yes	Yes	Yes	Yes	Yes	Yes	Yes	Yes	2	1	2	4	4	3	4	3	3	3	29	1	3
22	Female	Oromia	Urban	Single	Yes	5	1	1	Eniviromental Health	4th year	Social media and mass media	Correct and balanced	No	Yes	Yes	Several times a week	Yes	Yes	No		I think the restrictions are appropriate	Yes	Yes	Yes	Yes	Negatively	Decreased	Yes	Yes	Yes	Yes	No	Yes	No	Yes	No	0	4	4	1	0	3	4	1	0	2	19	2	4
22	Female	Addis Abeba	Urban	Single	Yes	5	1	1	Eniviromental Health	4th year	Mass media (TV, Radio)	Correct and balanced	No	Yes	Yes	Several times a week	Yes	No	No		I think the restrictions are not strict enough	No	No	No	Yes	Positively	Not changed	Yes	Yes	Yes	Yes	Yes	Yes	Yes	Yes	Yes	1	0	1	3	2	2	3	3	1	1	17	0	4
23	Female	Oromia	Rural	Single	Yes	3	1	1	Eniviromental Health	4th year	Social media and mass media	Correct and balanced	No	No	Yes	Rarely	Yes	I don't know	No		I think the restrictions are not strict enough	No	No	No	Yes	Positively	Not changed	No	Yes	Yes	Yes	No	Yes	Yes	Yes	Yes	0	1	1	3	1	2	2	2	1	1	14	0	1
25	Male	Oromia	Urban	Single	Yes	7	500	1	Eniviromental Health	4th year	Social media and mass media;Community (family, friends...)	Too much alarming	Yes	Yes	Yes	Several times a week	Yes	Yes	Yes	Due to work exposure	I think the restrictions are not strict enough	Yes	Yes	Yes	Yes	Positively	Decreased	Yes	Yes	Yes	Yes	Yes	No	Yes	Yes	Yes	3	4	4	4	0	0	4	4	4	4	31	1	4
23	Female	Oromia	Urban	Single	Yes	6	20000	1	Eniviromental Health	4th year	Social media and mass media	Correct and balanced	Yes	Yes	Yes	About once a week	Yes	Yes	Yes	Due to work exposure	I think the restrictions are not strict enough	No	Yes	No	Yes	Positively	Not changed	Yes	Yes	Yes	Yes	Yes	Yes	Yes	Yes	Yes	2	4	4	4	2	2	2	2	3	3	28	1	4
22	Male	Addis Abeba	Urban	Single	Yes	4	5000	1	Eniviromental Health	4th year	Social media	Hide reality not to scare	Yes	Yes	Yes	Rarely	Yes	Yes	Yes	Due to work exposure;Less execution of measures	I think the restrictions are not strict enough	Yes	Yes	Yes	Yes	Negatively	Decreased	No	Yes	Yes	No	No	No	Yes	Yes	Yes	4	4	3	2	3	0	2	0	4	3	25	2	3
24	Male	Southern Nation, Nationalities and People Region (SNNPR)	Urban	Single	Yes	5	1	1	Eniviromental Health	4th year	Social media and mass media	Correct and balanced	No	Yes	Yes	Rarely	Yes	Yes	No		I think the restrictions are appropriate	No	Yes	Yes	Yes	Positively	Decreased	Yes	Yes	Yes	Yes	No	No	Yes	Yes	Yes	4	4	4	3	0	3	3	1	4	4	30	2	3
23	Male	Oromia	Rural	Single	Yes	5	22000	1	Eniviromental Health	4th year	Social media	Too much alarming	No	No	Yes	Rarely	Yes	Yes	No	I donâ€™t know	I think the restrictions are not strict enough	No	No	No	No	Positively	Decreased	Yes	Yes	Yes	Yes	Yes	Yes	Yes	Yes	Yes	1	1	0	1	0	1	0	1	0	1	6	0	1
23	Female	Addis Abeba	Urban	Single	Yes	7	10000	1	Eniviromental Health	4th year	Social media and mass media	Correct and balanced	No	Yes	Yes	Rarely	Yes	Yes	No		I think the restrictions are not strict enough	Yes	Yes	Yes	No		Decreased	Yes	Yes	Yes	Yes	Yes	Yes	Yes	Yes	Yes	1	2	3	3	1	2	3	1	2	2	20	1	1
24	Male	Oromia	Urban	Single	Yes	7	3000	2	Generic nursing	4th year	Social media;Mass media (TV, Radio);Social media and mass media;Community (family, friends...)	Too much alarming	Yes	Yes	Yes	Every day or almost every day	Yes	Yes	Yes	Due to work exposure	I think the restrictions are not strict enough	Yes	Yes	Yes	Yes	Positively	Decreased	Yes	No	Yes	Yes	No	No	Yes	No	Yes	2	4	4	4	3	3	4	4	4	4	36	0	1
22	Female	Oromia	Urban	Single	Yes	6	15000	2	Generic nursing	4th year	Social media and mass media	Correct and balanced	Yes	Yes	Yes	Every day or almost every day	Yes	Yes	Yes	Due to existing medical condition	I think the restrictions are not strict enough	No	Yes	Yes	Yes	Negatively	Not changed	No	Yes	Yes	Yes	No	Yes	Yes	Yes	Yes	4	2	3	2	0	1	3	1	3	2	21	1	3
23	Male	Oromia	Urban	Single	Yes	6	10000	2	Generic nursing	4th year	Social media and mass media	Correct and balanced	Yes	Yes	Yes	Every day or almost every day	Yes	I don't know	Yes	Less execution of measures	I think the restrictions are not strict enough	No	Yes	No	No		Decreased	Yes	No	Yes	Yes	Yes	No	Yes	Yes	Yes	3	3	4	3	3	4	3	2	2	2	29	0	4
23	Female	Oromia	Rural	Single	Yes	8	10000	2	Generic nursing	4th year	Social media and mass media	Too much alarming	Yes	Yes	Yes	Rarely	Yes	I don't know	No		I think the restrictions are not strict enough	No	No	No	Yes	Positively	Decreased	Yes	Yes	No	Yes	No	Yes	Yes	Yes	Yes	0	4	1	1	2	3	2	2	2	2	19	1	4
23	Male	Amhara	Urban	Single	Yes	5	3000	2	Generic nursing	4th year	Mass media (TV, Radio)	Correct and balanced	Yes	Yes	Yes	About once a week	Yes	Yes	Yes	Due to work exposure	I think the restrictions are too strict	Yes	No	Yes	Yes	Positively	Increased	Yes	Yes	Yes	Yes	Yes	Yes	Yes	Yes	Yes	3	2	2	3	2	3	2	2	3	4	26	1	3
22	Female	Oromia	Urban	Single	Yes	5	2700	2	Generic nursing	4th year	Social media and mass media	Correct and balanced	Yes	Yes	Yes	Several times a week	Yes	I don't know	Yes	Due to work exposure	I think the restrictions are not strict enough	Yes	Yes	Yes	Yes	Positively	Not changed	Yes	Yes	Yes	Yes	Yes	Yes	Yes	Yes	Yes	2	1	2	4	2	3	3	2	2	2	23	0	3
22	Male	Southern Nation, Nationalities and People Region (SNNPR)	Urban	Single	Yes	4	16000	2	Generic nursing	4th year	Social media and mass media	Correct and balanced	No	No	Yes	Rarely	Yes	Yes	No		I think the restrictions are appropriate	No	No	No	No		Not changed	No	No	Yes	Yes	Yes	Yes	Yes	Yes	Yes	1	0	0	3	4	1	4	4	1	1	19	0	4
23	Female	Tigray	Urban	Single	Yes	4	11000	2	Generic nursing	4th year	Social media	Correct and balanced	Yes	Yes	Yes	Several times a week	Yes	Yes	Yes	Due to existing medical condition	I think the restrictions are not strict enough	No	Yes	Yes	Yes	Positively	Decreased	Yes	Yes	Yes	Yes	Yes	Yes	Yes	Yes	Yes	2	4	4	3	2	4	2	3	4	4	32	2	1
23	Male	Southern Nation, Nationalities and People Region (SNNPR)	Rural	Single	Yes	8	7000	2	Generic nursing	4th year	Social media and mass media	Too much alarming	Yes	Yes	Yes	Several times a week	Yes	Yes	Yes	Due to work exposure	I think the restrictions are not strict enough	Yes	Yes	Yes	Yes	Negatively	Decreased	Yes	Yes	Yes	Yes	No	Yes	Yes	Yes	Yes	1	1	1	2	2	4	2	2	2	1	18	1	2
22	Female	Oromia	Urban	Single	Yes	8	15000	2	Generic nursing	4th year	Social media and mass media	Too much alarming	Yes	Yes	Yes	About once a week	Yes	Yes	Yes	Due to work exposure	I think the restrictions are not strict enough	No	Yes	Yes	Yes	Positively	Decreased	Yes	Yes	Yes	Yes	No	Yes	Yes	No	Yes	4	4	4	2	0	4	0	1	4	4	27	2	2
22	Female	Oromia	Rural	Single	Yes	5	5000	2	Generic nursing	4th year	Social media	Too much alarming	Yes	Yes	Yes	Every day or almost every day	Yes	Yes	Yes	Due to work exposure	I think the restrictions are not strict enough	Yes	Yes	Yes	Yes	Negatively	Decreased	Yes	Yes	Yes	Yes	Yes	Yes	Yes	Yes	Yes	4	4	3	4	3	4	3	4	3	4	36	2	4
22	Male	Oromia	Urban	Single	Yes	5	5000	2	Generic nursing	4th year	Social media	Correct and balanced	No	No	No	Every day or almost every day	Yes	No	No		I think the restrictions are not strict enough	No	No	Yes	Yes	Negatively	Not changed	Yes	Yes	Yes	Yes	Yes	Yes	Yes	Yes	Yes	2	2	2	1	0	1	1	0	2	2	13	2	3
22	Female	Oromia	Urban	Single	Yes	3	10000	2	Generic nursing	4th year	Social media and mass media	Too much alarming	No	No	No	Several times a week	I don't know	Yes	Yes	Due to existing medical condition	I think the restrictions are appropriate	Yes	No	Yes	Yes	Positively	Increased	Yes	Yes	Yes	Yes	Yes	No	Yes	Yes	Yes	4	0	0	3	4	1	3	3	0	1	19	1	4
23	Female	Oromia	Urban	Single	Yes	8	1000	2	Generic nursing	4th year	Mass media (TV, Radio)	Too much alarming	Yes	Yes	Yes	Several times a week	Yes	Yes	Yes	Due to work exposure	I think the restrictions are appropriate	Yes	Yes	Yes	Yes	Positively	Decreased	Yes	Yes	Yes	Yes	Yes	Yes	Yes	Yes	Yes	4	4	3	2	3	2	3	2	2	4	29	2	3
23	Female	Oromia	Urban	Single	Yes	6	12000	2	Generic nursing	4th year	Mass media (TV, Radio)	Correct and balanced	No	No	Yes	Rarely	Yes	No	No		I think the restrictions are not strict enough	Yes	No	No	No		Not changed	No	Yes	No	No	No	Yes	No	Yes	No	3	3	3	2	0	2	3	3	3	2	24	2	3
23	Male	Southern Nation, Nationalities and People Region (SNNPR)	Rural	Single	Yes	7	50	2	Generic nursing	4th year	Mass media (TV, Radio)	Hide reality not to scare	Yes	Yes	No	Rarely	Yes	Yes	Yes	Due to work exposure	I think the restrictions are not strict enough	No	Yes	No	Yes	Negatively	Decreased	No	No	Yes	Yes	No	No	Yes	No	No	4	4	3	0	4	4	3	3	4	4	33	2	3
22	Female	Addis Abeba	Urban	Single	Yes	7	1	3	Generic Midwifey	4th year	Mass media (TV, Radio)	Correct and balanced	No	No	Yes	Several times a week	Yes	No	Yes	Due to work exposure	I think the restrictions are appropriate	No	No	No	No		Decreased	Yes	Yes	Yes	Yes	Yes	Yes	Yes	Yes	Yes	2	1	0	4	2	1	3	3	1	0	17	1	3
22	Male	Addis Abeba	Urban	Single	Yes	4	5000	3	Generic Midwifey	4th year	Social media and mass media	Too much alarming	No	Yes	Yes	Every day or almost every day	Yes	Yes	Yes	Due to work exposure	I think the restrictions are not strict enough	Yes	Yes	Yes	Yes	Positively	Decreased	Yes	Yes	Yes	Yes	Yes	Yes	Yes	Yes	Yes	2	1	1	4	3	2	3	4	1	1	22	1	3
24	Male	Oromia	Rural	Single	Yes	12	1300	3	Generic Midwifey	4th year	Community (family, friends...)	Hide reality not to scare	No	Yes	No	Rarely	Yes	Yes	No		I think the restrictions are appropriate	Yes	Yes	Yes	Yes	Positively	Decreased	Yes	Yes	Yes	Yes	Yes	Yes	Yes	Yes	Yes	0	2	0	0	0	0	3	0	1	1	7	0	4
22	Male	Addis Abeba	Urban	Single	Yes	5	7000	3	Generic Midwifey	4th year	Social media and mass media	Correct and balanced	No	No	Yes	Several times a week	Yes	Yes	No		I think the restrictions are appropriate	No	No	Yes	Yes	Negatively	Decreased	Yes	Yes	Yes	Yes	Yes	Yes	Yes	Yes	Yes	2	2	1	3	2	2	2	2	3	3	22	1	3
23	Male	Oromia	Rural	Single	Yes	10	1	3	Generic Midwifey	4th year	Social media and mass media	Too much alarming	Yes	No	No	About once a week	I don't know	No	No	I donâ€™t know	I think the restrictions are not strict enough	Yes	Yes	No	Yes	Negatively	Increased	Yes	Yes	No	No	Yes	Yes	No	Yes	No	2	3	2	4	1	2	3	3	2	3	25	2	2
27	Female	Oromia	Urban	Single	Yes	2	3900	3	Generic Midwifey	4th year	Social media	Too much alarming	Yes	Yes	Yes	Every day or almost every day	Yes	Yes	Yes	Due to work exposure;Less execution of measures	I think the restrictions are not strict enough	Yes	Yes	Yes	Yes	Negatively	Decreased	Yes	Yes	Yes	Yes	No	Yes	Yes	Yes	Yes	4	1	2	4	2	0	3	0	4	0	20	1	4
24	Female	Addis Abeba	Urban	Married	No	2	6000	3	Generic Midwifey	4th year	Social media and mass media	Too much alarming	No	No	Yes	Every day or almost every day	Yes	No	No		I think the restrictions are appropriate	Yes	No	No	No		Decreased	Yes	Yes	Yes	Yes	Yes	Yes	Yes	Yes	Yes	2	0	0	4	4	2	3	2	0	1	18	0	1
23	Male	Oromia	Urban	Single	Yes	10	10000	3	Generic Midwifey	4th year	Community (family, friends...)	Too much alarming	Yes	No	No	Several times a week	Yes	Yes	No		I think the restrictions are not strict enough	Yes	Yes	Yes	Yes	Positively	Decreased	No	No	No	Yes	No	No	Yes	Yes	Yes	3	0	4	4	4	4	4	4	0	2	29	2	4
21	Female	Addis Abeba	Urban	Single	Yes	6	1	3	Generic Midwifey	4th year	Social media	Correct and balanced	Yes	Yes	Yes	Several times a week	No	No	No		I think the restrictions are appropriate	No	No	No	No		Not changed	Yes	Yes	Yes	Yes	Yes	Yes	Yes	Yes	Yes	3	3	2	1	2	2	2	2	3	2	22	1	3
23	Male	Oromia	Rural	Single	Yes	10	800	3	Generic Midwifey	4th year	Social media and mass media	Too much alarming	No	No	Yes	Every day or almost every day	Yes	Yes	No		I think the restrictions are not strict enough	Yes	No	Yes	Yes		Decreased	Yes	Yes	Yes	Yes	Yes	Yes	Yes	Yes	Yes	2	0	0	0	0	0	0	0	0	0	2	0	2
23	Male	Oromia	Rural	Single	Yes	10	1000	3	Generic Midwifey	4th year	Social media and mass media	Too much alarming	No	No	Yes	Every day or almost every day	Yes	Yes	No		I think the restrictions are not strict enough	Yes	No	Yes	Yes	Negatively	Decreased	Yes	Yes	Yes	Yes	Yes	Yes	Yes	Yes	Yes	0	0	0	0	0	4	4	4	4	4	20	0	4
22	Female	Oromia	Rural	Single	Yes	10	1	3	Generic Midwifey	4th year	Social media	Correct and balanced	Yes	Yes	Yes	Several times a week	I don't know	No	Yes	Less execution of measures	I think the restrictions are too strict	Yes	No	Yes	Yes	Positively	Decreased	No	Yes	No	Yes	Yes	Yes	No	Yes	No	1	3	2	3	1	0	2	2	2	2	18	1	3
22	Male	Oromia	Urban	Single	Yes	4	10000	3	Generic Midwifey	4th year	Social media and mass media	Correct and balanced	Yes	Yes	Yes	Every day or almost every day	Yes	Yes	Yes	Due to existing medical condition	I think the restrictions are appropriate	No	No	Yes	Yes	Positively	Decreased	Yes	Yes	Yes	Yes	Yes	Yes	Yes	Yes	Yes	4	3	3	2	2	2	2	3	2	3	26	1	2
21	Female	Oromia	Urban	Married	Yes	3	10000	3	Generic Midwifey	4th year	Mass media (TV, Radio)	Correct and balanced	No	No	Yes	Rarely	Yes	No	Yes	Less execution of measures	I think the restrictions are not strict enough	Yes	No	No	No		Not changed	No	No	Yes	Yes	No	Yes	Yes	Yes	Yes	0	0	1	0	4	4	0	0	0	0	9	1	1
24	Male	Oromia	Urban	Single	Yes	6	10000	3	Generic Midwifey	4th year	Mass media (TV, Radio)	Correct and balanced	Yes	Yes	Yes	Every day or almost every day	Yes	Yes	No		I think the restrictions are not strict enough	Yes	No	Yes	Yes	Positively	Decreased	Yes	Yes	Yes	Yes	Yes	Yes	Yes	Yes	Yes	2	1	1	3	2	0	0	0	0	0	9	0	4
24	Male	Oromia	Urban	Single	Yes	6	10000	3	Generic Midwifey	4th year	Mass media (TV, Radio)	Correct and balanced	Yes	Yes	Yes	Every day or almost every day	Yes	Yes	No		I think the restrictions are appropriate	No	No	Yes	Yes	Positively	Decreased	Yes	Yes	Yes	Yes	Yes	Yes	Yes	Yes	Yes	1	1	0	0	0	0	0	1	2	1	6	0	4
24	Male	Oromia	Urban	Single	Yes	6	10000	3	Generic Midwifey	4th year	Mass media (TV, Radio)	Correct and balanced	Yes	Yes	Yes	Every day or almost every day	Yes	Yes	No		I think the restrictions are appropriate	No	No	Yes	Yes	Positively	Decreased	Yes	Yes	Yes	Yes	Yes	Yes	Yes	Yes	Yes	1	1	0	0	0	0	0	1	2	1	6	0	4
22	Female	Oromia	Rural	Single	Yes	4	10000	4	Medical labratory	4th year	Social media and mass media	Correct and balanced	Yes	Yes	Yes	Several times a week	Yes	No	Yes	Due to work exposure;I donâ€™t know	I think the restrictions are not strict enough	No	Yes	Yes	Yes	Positively	Increased	Yes	Yes	Yes	Yes	Yes	Yes	Yes	Yes	Yes	4	4	3	2	0	1	4	0	4	2	24	1	2
23	Female	Oromia	Urban	Single	Yes	5	16000	7	Pharmacy	4th year	Social media and mass media	Too much alarming	Yes	Yes	Yes	Every day or almost every day	Yes	Yes	Yes	Due to work exposure	I think the restrictions are not strict enough	Yes	Yes	Yes	Yes	Positively	Decreased	Yes	Yes	Yes	Yes	No	No	No	Yes	Yes	4	4	4	4	0	4	1	3	4	4	32	1	4
22	Male	Oromia	Urban	Single	Yes	6	15000	7	Pharmacy	4th year	Social media and mass media	Too much alarming	Yes	No	Yes	Every day or almost every day	Yes	Yes	Yes	Due to work exposure	I think the restrictions are appropriate	Yes	Yes	Yes	Yes	Negatively	Decreased	Yes	Yes	Yes	Yes	No	Yes	No	Yes	Yes	3	3	2	1	1	3	1	1	3	3	21	2	1
22	Female	Addis Abeba	Urban	Single	Yes	5	1	7	Pharmacy	4th year	Social media	Correct and balanced	Yes	No	Yes	About once a week	Yes	No	Yes	Due to work exposure	I think the restrictions are appropriate	Yes	No	No	Yes	Positively	Not changed	Yes	No	Yes	Yes	Yes	Yes	Yes	Yes	Yes	2	1	2	3	2	1	1	0	2	2	16	0	2
22	Female	Oromia	Urban	Single	Yes	4	1	7	Pharmacy	4th year	Social media and mass media	Correct and balanced	No	Yes	Yes	About once a week	I don't know	No	No		I think the restrictions are appropriate	No	No	No	Yes	Positively	Not changed	Yes	Yes	Yes	Yes	Yes	Yes	Yes	Yes	Yes	4	4	2	2	0	0	1	2	4	2	21	2	2
23	Female	Oromia	Urban	Single	Yes	5	10000	7	Pharmacy	4th year	Social media	Too much alarming	Yes	Yes	Yes	Rarely	Yes	Yes	Yes	Due to existing medical condition	I think the restrictions are not strict enough	No	Yes	No	No		Not changed	No	Yes	Yes	Yes	No	Yes	Yes	Yes	Yes	2	2	2	0	0	2	3	0	2	3	16	1	2
21	Female	Oromia	Urban	Single	Yes	4	8539	7	Pharmacy	4th year	Social media and mass media	Correct and balanced	Yes	Yes	Yes	About once a week	Yes	No	No		I think the restrictions are appropriate	No	No	No	Yes	Positively	Not changed	Yes	Yes	Yes	Yes	Yes	Yes	Yes	Yes	Yes	2	2	2	3	3	2	3	2	2	1	22	0	3
22	Female	Oromia	Urban	Single	Yes	4	18000	7	Pharmacy	4th year	Social media and mass media	Hide reality not to scare	Yes	Yes	No	About once a week	Yes	Yes	No		I think the restrictions are not strict enough	No	No	No	No		Decreased	Yes	No	Yes	Yes	Yes	Yes	Yes	Yes	Yes	3	3	2	2	1	1	3	2	3	2	22	2	2
22	Female	Oromia	Urban	Single	Yes	5	10000	7	Pharmacy	4th year	Social media and mass media	Hide reality not to scare	Yes	Yes	No	About once a week	No	No	No		I think the restrictions are appropriate	No	Yes	Yes	Yes	Positively	Not changed	Yes	Yes	Yes	Yes	Yes	Yes	Yes	Yes	Yes	4	0	3	3	3	0	0	1	4	4	22	0	4
22	Female	Oromia	Urban	Single	Yes	5	15000	7	Pharmacy	4th year	Social media and mass media	Correct and balanced	Yes	Yes	Yes	About once a week	Yes	Yes	Yes	Due to work exposure	I think the restrictions are appropriate	No	No	Yes	Yes	Positively	Decreased	Yes	Yes	Yes	Yes	Yes	Yes	Yes	Yes	Yes	2	0	4	2	2	2	1	1	2	2	18	2	3
26	Male	Benishangul Gumuz	Urban	Single	Yes	6	62000	7	Pharmacy	4th year	Social media	Too much alarming	Yes	Yes	Yes	Every day or almost every day	Yes	Yes	Yes	Due to work exposure	I think the restrictions are appropriate	No	Yes	Yes	Yes	Positively	Decreased	No	No	No	Yes	No	Yes	Yes	Yes	Yes	3	3	3	1	1	3	1	2	4	4	25	2	2
24	Female	Addis Abeba	Urban	Single	Yes	14	1	7	Pharmacy	4th year	Social media;Mass media (TV, Radio);Social media and mass media;Community (family, friends...)	Hide reality not to scare	No	No	Yes	Rarely	Yes	Yes	No		I think the restrictions are not strict enough	No	No	Yes	Yes	Negatively	Decreased	Yes	No	Yes	No	No	No	Yes	Yes	Yes	4	4	2	3	0	2	3	3	2	1	24	0	4
21	Female	Southern Nation, Nationalities and People Region (SNNPR)	Urban	Single	Yes	6	15000	7	Pharmacy	4th year	Social media and mass media	Too much alarming	Yes	Yes	Yes	About once a week	Yes	Yes	Yes	Due to existing medical condition	I think the restrictions are not strict enough	Yes	Yes	Yes	Yes	Positively	Not changed	Yes	No	Yes	Yes	Yes	No	Yes	Yes	Yes	1	4	4	0	0	3	1	2	3	3	21	2	3
22	Male	Oromia	Rural	Single	Yes	8	100	7	Pharmacy	4th year	Social media and mass media	Too much alarming	Yes	Yes	Yes	Rarely	Yes	Yes	Yes	Due to work exposure	I think the restrictions are appropriate	No	Yes	Yes	Yes	Negatively	Decreased	Yes	Yes	Yes	No	Yes	No	Yes	Yes	Yes	4	2	4	1	2	4	2	0	4	4	27	2	2
23	Female	Southern Nation, Nationalities and People Region (SNNPR)	Urban	Single	Yes	4	11000	2	Generic nursing	5th year	Social media	Hide reality not to scare	Yes	Yes	Yes	Rarely	Yes	Yes	Yes	Due to work exposure;Less execution of measures	I think the restrictions are not strict enough	No	No	Yes	Yes	Negatively	Not changed	Yes	Yes	Yes	Yes	No	Yes	No	Yes	Yes	4	2	4	3	1	4	2	4	4	3	31	2	3
24	Male	Oromia	Urban	Single	No	8	1	2	Generic nursing	5th year	Mass media (TV, Radio)	Correct and balanced	Yes	Yes	Yes	Several times a week	Yes	Yes	No		I think the restrictions are too strict	Yes	Yes	Yes	Yes	Positively	Decreased	Yes	Yes	Yes	Yes	No	Yes	Yes	Yes	Yes	2	0	2	3	4	2	3	1	0	2	19	2	2
24	Female	Gambella	Urban	Single	Yes	9	11000	2	Generic nursing	5th year	Social media	Too much alarming	Yes	Yes	Yes	Rarely	Yes	No	No	I donâ€™t know	I think the restrictions are not strict enough	No	No	Yes	Yes	Positively	Decreased	Yes	Yes	Yes	Yes	Yes	Yes	Yes	Yes	Yes	3	0	0	0	2	0	3	3	3	2	16	0	2
23	Female	Oromia	Urban	Single	Yes	8	1	2	Generic nursing	5th year	Mass media (TV, Radio)	Hide reality not to scare	Yes	Yes	Yes	Several times a week	No	No	Yes	Due to existing medical condition	I think the restrictions are appropriate	No	No	Yes	Yes	Negatively	Not changed	Yes	Yes	Yes	Yes	No	Yes	Yes	Yes	Yes	2	3	2	1	3	1	3	1	1	1	18	1	2
23	Female	Oromia	Urban	Single	Yes	8	1	2	Generic nursing	5th year	Mass media (TV, Radio)	Hide reality not to scare	Yes	Yes	Yes	Several times a week	No	No	Yes	Due to existing medical condition	I think the restrictions are appropriate	No	No	Yes	Yes	Negatively	Not changed	Yes	Yes	Yes	Yes	No	Yes	Yes	Yes	Yes	2	3	2	1	3	1	3	1	1	1	18	1	2
24	Female	Oromia	Urban	Single	Yes	3	8700	2	Generic nursing	5th year	Social media and mass media	Correct and balanced	Yes	Yes	Yes	Several times a week	Yes	Yes	Yes	Due to work exposure	I think the restrictions are appropriate	No	No	Yes	Yes	Positively	Decreased	Yes	Yes	Yes	Yes	Yes	Yes	Yes	Yes	Yes	2	4	4	3	4	2	3	3	4	4	33	1	4
27	Female	Oromia	Urban	Married	No	3	10000	2	Generic nursing	5th year	Social media	Correct and balanced	Yes	Yes	Yes	Every day or almost every day	Yes	Yes	Yes	Due to work exposure	I think the restrictions are not strict enough	Yes	No	Yes	Yes	Negatively	Not changed	Yes	Yes	Yes	Yes	Yes	No	Yes	Yes	Yes	2	3	4	1	4	2	4	3	3	4	30	2	4
26	Female	Oromia	Urban	Married	Yes	6	3600	2	Generic nursing	5th year	Mass media (TV, Radio)	Correct and balanced	Yes	Yes	Yes	Several times a week	Yes	Yes	Yes	Due to work exposure	I think the restrictions are appropriate	Yes	Yes	Yes	Yes	Positively	Decreased	Yes	Yes	Yes	Yes	Yes	Yes	Yes	Yes	Yes	3	3	2	2	2	2	3	2	3	3	25	2	3
23	Female	Oromia	Urban	Single	Yes	7	10000	2	Generic nursing	5th year	Mass media (TV, Radio)	Correct and balanced	No	No	Yes	Several times a week	Yes	Yes	Yes	Due to work exposure	I think the restrictions are not strict enough	No	Yes	Yes	Yes	Positively	Decreased	Yes	Yes	Yes	Yes	Yes	Yes	Yes	Yes	Yes	3	2	1	4	0	1	4	2	0	2	19	2	4
24	Female	Oromia	Urban	Single	Yes	2	9000	2	Generic nursing	5th year	Social media and mass media	Correct and balanced	Yes	Yes	Yes	Several times a week	Yes	Yes	Yes	Due to existing medical condition	I think the restrictions are not strict enough	No	Yes	No	Yes	Positively	Not changed	Yes	Yes	Yes	Yes	No	No	Yes	Yes	Yes	0	0	1	1	0	0	2	0	0	0	4	1	2
32	Male	Oromia	Urban	Single	No	4	1000	2	Generic nursing	5th year	Social media and mass media	Too much alarming	Yes	Yes	Yes	Several times a week	Yes	Yes	No		I think the restrictions are not strict enough	Yes	No	Yes	Yes	Negatively	Decreased	Yes	Yes	Yes	Yes	Yes	Yes	Yes	Yes	Yes	1	3	4	4	1	2	3	4	0	4	26	1	3
25	Male	Oromia	Urban	Married	Yes	4	6000	2	Generic nursing	5th year	Mass media (TV, Radio)	Too much alarming	Yes	Yes	Yes	Several times a week	Yes	Yes	Yes	Due to work exposure	I think the restrictions are not strict enough	Yes	Yes	Yes	Yes	Positively	Decreased	Yes	Yes	Yes	Yes	Yes	No	Yes	Yes	No	3	3	0	2	4	1	4	3	3	3	26	0	4
24	Female	Amhara	Urban	Married	Yes	2	5000	2	Generic nursing	5th year	Mass media (TV, Radio)	Correct and balanced	Yes	Yes	Yes	Several times a week	Yes	No	No		I think the restrictions are too strict	No	Yes	Yes	Yes	Positively	Decreased	Yes	Yes	Yes	No	Yes	Yes	Yes	Yes	Yes	2	2	0	0	2	0	1	0	3	0	10	2	2
23	Female	Oromia	Urban	Single	Yes	5	16000	2	Generic nursing	5th year	Social media and mass media	Too much alarming	Yes	Yes	Yes	Several times a week	Yes	Yes	No	Due to existing medical condition	I think the restrictions are not strict enough	Yes	Yes	Yes	Yes	Positively	Not changed	Yes	Yes	Yes	Yes	Yes	Yes	Yes	Yes	Yes	4	2	2	3	2	2	0	4	1	2	22	0	3
27	Male	Oromia	Urban	Single	No	6	5000	3	Generic Midwifey	5th year	Mass media (TV, Radio)	Hide reality not to scare	Yes	Yes	No	Rarely	Yes	Yes	Yes	Due to work exposure	I think the restrictions are not strict enough	Yes	Yes	Yes	Yes	Positively	Decreased	Yes	Yes	Yes	Yes	Yes	Yes	Yes	Yes	Yes	3	1	2	2	2	3	3	2	3	3	24	2	3
22	Female	Oromia	Urban	Single	Yes	5	8000	7	Pharmacy	5th year	Social media and mass media	Correct and balanced	Yes	Yes	Yes	Every day or almost every day	Yes	Yes	No		I think the restrictions are not strict enough	No	No	Yes	Yes	Positively	Decreased	Yes	Yes	Yes	Yes	Yes	Yes	Yes	Yes	Yes	2	0	0	2	2	2	0	2	2	1	13	0	4
28	Male	Oromia	Urban	Single	No	1	5000	7	Pharmacy	5th year	Mass media (TV, Radio)	Correct and balanced	Yes	Yes	Yes	Rarely	Yes	Yes	Yes	Less execution of measures	I think the restrictions are not strict enough	No	Yes	Yes	Yes	Positively	Decreased	Yes	Yes	Yes	Yes	Yes	No	Yes	No	Yes	2	3	0	3	4	0	0	4	0	0	16	2	4
23	Female	Addis Abeba	Urban	Single	Yes	6	5000	7	Pharmacy	5th year	Social media	Correct and balanced	Yes	Yes	Yes	Every day or almost every day	Yes	Yes	Yes	Due to work exposure	I think the restrictions are appropriate	No	No	Yes	Yes	Positively	Not changed	Yes	Yes	Yes	Yes	Yes	No	Yes	Yes	Yes	3	2	4	2	1	2	1	2	3	3	23	2	2
23	Male	Oromia	Rural	Single	Yes	4	8000	7	Pharmacy	5th year	Social media and mass media	Correct and balanced	Yes	Yes	Yes	Several times a week	I don't know	Yes	No	I donâ€™t know	I think the restrictions are not strict enough	Yes	No	Yes	No		Increased	Yes	Yes	Yes	Yes	Yes	Yes	Yes	Yes	Yes	2	3	3	3	3	3	3	3	3	4	30	1	3
24	Male	Southern Nation, Nationalities and People Region (SNNPR)	Rural	Single	Yes	8	2000	7	Pharmacy	5th year	Social media and mass media	Correct and balanced	Yes	Yes	Yes	Several times a week	Yes	Yes	No		I think the restrictions are appropriate	No	No	Yes	Yes	Positively	Decreased	Yes	Yes	Yes	Yes	Yes	Yes	Yes	Yes	Yes	4	4	0	3	3	3	3	3	4	2	29	0	4
26	Male	Oromia	Urban	Single	Yes	15	5000	7	Pharmacy	5th year	Social media and mass media	Correct and balanced	Yes	Yes	Yes	Every day or almost every day	Yes	Yes	Yes	Due to existing medical condition	I think the restrictions are too strict	Yes	Yes	Yes	Yes	Positively	Decreased	Yes	Yes	Yes	Yes	Yes	Yes	Yes	Yes	Yes	1	0	0	4	1	0	0	4	2	1	13	1	3
25	Male	Oromia	Urban	Single	Yes	15	3000	7	Pharmacy	5th year	Social media and mass media	Correct and balanced	Yes	Yes	Yes	Every day or almost every day	Yes	No	No	Due to existing medical condition	I think the restrictions are too strict	Yes	Yes	No	Yes	Positively	Not changed	Yes	Yes	Yes	Yes	Yes	Yes	Yes	Yes	Yes	2	0	0	3	2	0	0	1	0	2	10	1	3
24	Male	Oromia	Rural	Single	Yes	4	800	7	Pharmacy	5th year	Social media and mass media	Correct and balanced	Yes	Yes	Yes	Several times a week	Yes	Yes	Yes	Less execution of measures	I think the restrictions are not strict enough	No	No	No	Yes	Negatively	Decreased	No	No	No	No	No	No	Yes	Yes	Yes	4	3	4	1	1	1	1	0	4	0	19	2	3
23	Female	Oromia	Urban	Single	Yes	7	7000	7	Pharmacy	5th year	Mass media (TV, Radio)	Correct and balanced	Yes	Yes	Yes	Every day or almost every day	Yes	I don't know	Yes	Due to work exposure	I think the restrictions are not strict enough	Yes	Yes	Yes	Yes	Positively	Decreased	Yes	Yes	Yes	Yes	Yes	No	Yes	Yes	Yes	3	3	3	3	2	2	3	3	3	2	27	2	2
23	Female	Oromia	Urban	Single	Yes	5	1500	7	Pharmacy	5th year	Social media and mass media	Correct and balanced	No	Yes	Yes	Every day or almost every day	Yes	Yes	Yes	Due to work exposure	I think the restrictions are not strict enough	No	No	No	Yes	Positively	Decreased	Yes	Yes	Yes	Yes	Yes	Yes	Yes	Yes	Yes	4	0	0	0	4	0	0	4	0	4	16	2	4
26	Female	Oromia	Urban	Single	Yes	6	15000	7	Pharmacy	5th year	Mass media (TV, Radio)	Correct and balanced	Yes	Yes	Yes	Rarely	Yes	Yes	Yes	Due to work exposure	I think the restrictions are not strict enough	Yes	No	Yes	Yes	Positively	Decreased	Yes	Yes	Yes	Yes	Yes	Yes	Yes	Yes	Yes	2	2	3	3	2	2	2	3	3	3	25	1	3
23	Male	Oromia	Urban	Single	Yes	5	1	7	Pharmacy	5th year	Mass media (TV, Radio)	Too much alarming	Yes	Yes	Yes	Every day or almost every day	Yes	Yes	No		I think the restrictions are not strict enough	Yes	Yes	Yes	No		Decreased	Yes	Yes	Yes	Yes	No	No	Yes	Yes	Yes	2	2	2	4	2	1	4	3	1	1	22	1	3
21	Male	Oromia	Urban	Single	Yes	15	1000	7	Pharmacy	5th year	Mass media (TV, Radio)	Too much alarming	No	No	Yes	Rarely	Yes	Yes	Yes	Due to existing medical condition;Due to work exposure	I think the restrictions are not strict enough	Yes	Yes	No	Yes	Positively	Decreased	Yes	Yes	Yes	Yes	Yes	Yes	Yes	Yes	Yes	4	4	4	4	4	4	4	4	4	3	39	2	3
23	Female	Oromia	Urban	Single	Yes	7	10000	7	Pharmacy	6th year	Social media and mass media;Community (family, friends...)	Correct and balanced	No	No	Yes	About once a week	Yes	Yes	No		I think the restrictions are not strict enough	No	Yes	Yes	Yes	Negatively	Not changed	Yes	Yes	Yes	Yes	No	Yes	Yes	Yes	Yes	0	0	1	2	4	4	1	0	2	0	14	1	1
24	Male	Oromia	Rural	Single	Yes	6	1	7	Pharmacy	6th year	Social media and mass media	Correct and balanced	No	No	Yes	Several times a week	Yes	I don't know	Yes	Due to work exposure	I think the restrictions are not strict enough	No	Yes	Yes	Yes	Positively	Not changed	Yes	Yes	Yes	Yes	Yes	Yes	Yes	Yes	Yes	3	2	3	3	1	2	2	2	1	3	22	2	2
23	Female	Southern Nation, Nationalities and People Region (SNNPR)	Urban	Single	Yes	6	1	7	Pharmacy	6th year	Social media	Correct and balanced	Yes	Yes	Yes	Several times a week	Yes	No	Yes	Due to work exposure	I think the restrictions are not strict enough	Yes	Yes	Yes	Yes	Positively	Decreased	Yes	No	Yes	Yes	No	Yes	Yes	Yes	Yes	2	0	2	3	1	1	1	1	2	2	15	2	3
23	Female	Oromia	Urban	Single	Yes	8	6000	7	Pharmacy	6th year	Social media and mass media	Correct and balanced	No	No	Yes	Several times a week	Yes	I don't know	No		I think the restrictions are appropriate	No	Yes	No	Yes	Positively	Not changed	Yes	Yes	Yes	Yes	Yes	Yes	Yes	Yes	Yes	3	3	3	1	1	3	1	1	3	3	22	1	2
24	Male	Oromia	Urban	Single	No	7	800	7	Pharmacy	6th year	Social media;Mass media (TV, Radio);Social media and mass media;Community (family, friends...)	Correct and balanced	No	No	Yes	Every day or almost every day	No	No	No		I think the restrictions are not strict enough	No	Yes	Yes	Yes	Positively	Decreased	Yes	Yes	Yes	Yes	Yes	Yes	Yes	Yes	Yes	4	2	4	0	2	2	2	2	1	1	20	2	1
26	Male	Oromia	Urban	Single	Yes	7	1	7	Pharmacy	6th year	Mass media (TV, Radio)	Correct and balanced	No	No	Yes	Rarely	Yes	Yes	Yes	Due to work exposure	I think the restrictions are not strict enough	No	Yes	Yes	Yes	Positively	Decreased	Yes	Yes	Yes	Yes	Yes	Yes	Yes	Yes	Yes	2	4	4	2	4	2	4	4	2	3	31	2	1
26	Male	Oromia	Urban	Single	Yes	5	10000	7	Pharmacy	6th year	Social media and mass media	Correct and balanced	No	No	Yes	Several times a week	Yes	Yes	Yes	Due to work exposure	I think the restrictions are not strict enough	Yes	No	Yes	Yes	Positively	Not changed	No	Yes	Yes	Yes	No	No	Yes	Yes	No	3	3	0	2	1	3	3	2	4	4	25	1	2
26	Male	Oromia	Urban	Married	Yes	4	1	7	Pharmacy	6th year	Social media	Hide reality not to scare	Yes	Yes	Yes	Several times a week	Yes	Yes	Yes	Due to work exposure	I think the restrictions are not strict enough	Yes	Yes	Yes	Yes	Negatively	Decreased	Yes	Yes	Yes	Yes	No	Yes	Yes	Yes	Yes	2	2	2	2	2	2	2	2	2	2	20	2	3
26	Male	Oromia	Urban	Married	Yes	4	1	7	Pharmacy	6th year	Social media	Hide reality not to scare	Yes	Yes	Yes	Several times a week	Yes	Yes	Yes	Due to work exposure	I think the restrictions are not strict enough	Yes	Yes	Yes	Yes	Negatively	Decreased	Yes	Yes	Yes	Yes	No	Yes	Yes	Yes	Yes	2	2	2	2	2	2	2	2	2	2	20	2	3
24	Male	Oromia	Urban	Single	Yes	6	2500	7	Pharmacy	6th year	Mass media (TV, Radio)	Too much alarming	No	Yes	Yes	Every day or almost every day	I don't know	No	No		I think the restrictions are not strict enough	No	No	No	Yes	Positively	Decreased	Yes	Yes	Yes	Yes	Yes	Yes	Yes	Yes	Yes	0	0	0	0	3	3	4	3	0	0	13	0	4
24	Male	Oromia	Urban	Single	Yes	5	10000	7	Pharmacy	6th year	Social media and mass media	Correct and balanced	Yes	No	Yes	About once a week	Yes	Yes	No		I think the restrictions are not strict enough	No	No	No	No		Not changed	Yes	Yes	Yes	Yes	No	Yes	Yes	Yes	Yes	2	2	3	2	3	1	2	1	0	2	18	2	3
23	Female	Oromia	Urban	Single	Yes	3	3000	7	Pharmacy	6th year	Social media and mass media	Too much alarming	Yes	Yes	Yes	Every day or almost every day	Yes	Yes	Yes	Due to work exposure	I think the restrictions are not strict enough	No	Yes	Yes	Yes	Positively	Decreased	Yes	Yes	Yes	Yes	Yes	Yes	Yes	Yes	Yes	0	3	3	2	2	3	3	3	2	1	22	2	2
23	Female	Southern Nation, Nationalities and People Region (SNNPR)	Urban	Single	Yes	5	8000	7	Pharmacy	6th year	Social media and mass media	Too much alarming	Yes	Yes	Yes	Every day or almost every day	Yes	Yes	No		I think the restrictions are not strict enough	Yes	No	Yes	Yes	Positively	Decreased	Yes	No	Yes	Yes	Yes	No	Yes	Yes	Yes	4	0	2	0	3	3	0	4	2	3	21	2	2
34	Male	Oromia	Urban	Married	Yes	5	10000	7	Pharmacy	6th year	Social media	Correct and balanced	Yes	Yes	Yes	Rarely	Yes	Yes	Yes	Due to work exposure	I think the restrictions are not strict enough	No	No	Yes	Yes	Positively	Decreased	Yes	Yes	Yes	Yes	Yes	No	Yes	Yes	Yes	1	0	1	1	2	1	3	1	1	1	12	1	3
24	Male	Southern Nation, Nationalities and People Region (SNNPR)	Urban	Single	Yes	6	10000	7	Pharmacy	6th year	Social media and mass media	Correct and balanced	Yes	Yes	Yes	Rarely	Yes	Yes	No		I think the restrictions are not strict enough	No	No	Yes	Yes	Negatively	Decreased	Yes	Yes	Yes	Yes	Yes	Yes	Yes	Yes	Yes	2	4	0	2	2	4	0	2	3	3	22	2	2
26	Female	Oromia	Urban	Single	Yes	8	8000	7	Pharmacy	6th year	Mass media (TV, Radio)	Too much alarming	Yes	Yes	Yes	Every day or almost every day	No	No	No		I think the restrictions are appropriate	Yes	No	Yes	Yes	Positively	Not changed	Yes	Yes	Yes	Yes	Yes	Yes	Yes	Yes	Yes	4	4	4	3	2	4	2	2	4	4	33	2	4
24	Female	Oromia	Rural	Married	Yes	4	6000	7	Pharmacy	6th year	Social media and mass media	Correct and balanced	Yes	Yes	Yes	Several times a week	Yes	Yes	No	Less execution of measures	I think the restrictions are too strict	Yes	Yes	Yes	Yes	Negatively	Increased	Yes	Yes	Yes	Yes	Yes	Yes	Yes	Yes	Yes	1	3	2	3	2	2	1	1	1	2	18	2	3
24	Female	Oromia	Urban	Single	Yes	6	9000	7	Pharmacy	6th year	Mass media (TV, Radio)	Correct and balanced	Yes	Yes	Yes	Several times a week	No	No	No	I donâ€™t know	I think the restrictions are appropriate	No	No	Yes	Yes	Negatively	Not changed	Yes	Yes	Yes	Yes	Yes	Yes	Yes	Yes	No	1	2	2	4	2	2	2	1	3	3	22	2	4
24	Female	Oromia	Urban	Single	Yes	6	9000	7	Pharmacy	6th year	Mass media (TV, Radio)	Correct and balanced	Yes	Yes	Yes	About once a week	Yes	Yes	No	I donâ€™t know	I think the restrictions are appropriate	No	Yes	Yes	Yes	Negatively	Not changed	Yes	Yes	Yes	Yes	Yes	Yes	Yes	Yes	Yes	2	1	4	2	2	2	3	2	1	1	20	2	1
23	Male	Oromia	Urban	Married	Yes	4	100	7	Pharmacy	6th year	Social media and mass media	Hide reality not to scare	No	No	Yes	Every day or almost every day	Yes	Yes	No		I think the restrictions are appropriate	No	No	Yes	Yes	Positively	Decreased	Yes	Yes	Yes	Yes	Yes	Yes	Yes	Yes	Yes	4	3	2	4	0	1	2	3	2	2	23	1	1
24	Female	Oromia	Urban	Single	Yes	4	4000	7	Pharmacy	6th year	Social media and mass media	Correct and balanced	Yes	Yes	Yes	Every day or almost every day	Yes	Yes	Yes	Due to work exposure	I think the restrictions are appropriate	Yes	Yes	Yes	Yes	Positively	Decreased	Yes	Yes	Yes	Yes	Yes	Yes	Yes	Yes	Yes	4	4	4	4	4	4	4	2	3	3	36	2	4
32	Male	Oromia	Urban	Married	Yes	3	5000	7	Pharmacy	6th year	Social media	Hide reality not to scare	Yes	Yes	Yes	Several times a week	Yes	Yes	Yes	Due to work exposure	I think the restrictions are not strict enough	No	No	No	Yes	Positively	Decreased	Yes	No	Yes	Yes	Yes	Yes	Yes	Yes	Yes	0	1	2	2	2	2	3	3	3	3	21	1	3
32	Male	Oromia	Urban	Married	Yes	3	5000	7	Pharmacy	6th year	Social media	Hide reality not to scare	Yes	Yes	Yes	Several times a week	Yes	Yes	Yes	Due to work exposure	I think the restrictions are not strict enough	No	No	No	Yes	Positively	Decreased	Yes	No	Yes	Yes	Yes	Yes	Yes	Yes	Yes	0	1	2	2	2	2	3	3	3	3	21	1	3
23	Male	Oromia	Urban	Single	Yes	8	5000	7	Pharmacy	6th year	Mass media (TV, Radio)	Correct and balanced	No	No	Yes	About once a week	Yes	Yes	No		I think the restrictions are appropriate	No	No	No	Yes	Positively	Decreased	Yes	Yes	Yes	Yes	Yes	Yes	Yes	Yes	Yes	3	4	0	3	3	3	3	2	2	2	25	1	3
24	Female	Amhara	Urban	Single	Yes	7	30000	7	Pharmacy	6th year	Social media and mass media	Correct and balanced	Yes	Yes	Yes	Every day or almost every day	Yes	Yes	No		I think the restrictions are appropriate	Yes	No	Yes	No		Decreased	Yes	Yes	Yes	Yes	Yes	Yes	Yes	Yes	Yes	4	4	4	1	0	0	1	4	4	2	24	2	3
24	Male	Oromia	Urban	Single	Yes	5	10000	7	Pharmacy	6th year	Social media and mass media	Correct and balanced	Yes	Yes	Yes	About once a week	Yes	Yes	No		I think the restrictions are appropriate	No	No	No	No		Not changed	Yes	Yes	Yes	Yes	Yes	Yes	Yes	Yes	Yes	2	2	2	1	2	2	3	1	2	2	19	1	2
[truncated: 58 more columns]
